# Supplementary material for: Outer Membrane Vesicles Secreted by Helicobacter pylori Transmitting Gastric Pathogenic Virulence Factors
Source: PubMed Central journal article supplement — ACS Omega. 2021 Dec 28;7(1):240–58. doi: 10.1021/acsomega.1c04549 (PMC8756444; doi:10.1021/acsomega.1c04549), 2021-12-28
Supplement: ao1c04549_si_001.pdf [file ao1c04549_si_001.pdf]

## Supporting Information

### Outer Membrane Vesicles Secreted by *Helicobacter pylori* transmitting Gastric Pathogenic Virulence Factors

Sisi Wei<sup>1#</sup>, Xiaoya Li<sup>1#</sup>, Jingjing Wang<sup>1</sup>, Yaojie Wang<sup>1</sup>, Cong Zhang<sup>1</sup>, Suli Dai<sup>1</sup>, Xian Wang<sup>2</sup>,  
Xiaoqing Deng<sup>1</sup>, Lianmei Zhao<sup>1\*</sup>, Baoen Shan<sup>1\*</sup>

1 Research Center, Hebei Medical University Fourth Affiliated Hospital and Hebei Provincial Tumor Hospital, Shijiazhuang, Hebei Province, 050011, China.

2 Shijiazhuang Center for Disease Control and Prevention, Shijiazhuang, Hebei Province, 050011, China.

# These authors contributed equally to this work as co-first authors.

\* Baoen Shan and Lianmei Zhao are co-corresponding authors.

\*Corresponding author:

Professor Baoen Shan, Research Center, the Fourth Hospital of Hebei Medical University, Shijiazhuang, Hebei Province, 050011, China.

Telephone: 0311-86095283 E-mail: [shanbaoen@163.com](mailto:shanbaoen@163.com)

Professor Lianmei Zhao, Research Center, the Fourth Hospital of Hebei Medical University, Shijiazhuang, Hebei Province, 050011, China.

Telephone: 0311-86095290 E-mail: [lianmeizhmail@163.com](mailto:lianmeizhmail@163.com)

Table S1. Differentially expressed proteins in GES1 cocultured with increasing concentrations of 11637 OMVs (0, 10, 20 or 40 µg).

| 11637 OMVs-10µg |                |             |           |                |             |
|-----------------|----------------|-------------|-----------|----------------|-------------|
| Gene Name       | Sample/Control | P-Value     | Gene Name | Sample/Control | P-Value     |
| TUBB8           | 2.162          | 0.024217601 | TNS3      | 2.212          | 0.153284972 |
| THBS1           | 2.807          | 6.77451E-08 | VTN       | 2.621          | 5.70993E-07 |
| POSTN           | 8.991          | 2.54011E-16 | ASS1      | 3.936          | 6.45229E-08 |
| HIST2H3A        | 0.29           | 3.52256E-12 | FAM82B    | 0.444          | 0.011002043 |
| PEA15           | 0.35           | 3.47029E-09 | ATP5J     | 2.492          | 0.001485869 |
| KPNA1           | 0.301          | 5.91744E-08 | SUMO2     | 0.477          | 0.00024107  |
| C3              | 3.876          | 1.4901E-13  | MCU       | 2.724          | 0.020926126 |
| KRT5            | 2.385          | 0.000124825 | APOE      | 2.016          | 0.035937632 |
| HBA2            | 2.342          | 4.97293E-07 | COL6A1    | 2.447          | 0.244229396 |
| APOB            | 5.045          | 2.54011E-16 | NHP2L1    | 3.625          | 2.40622E-07 |
| F2              | 4.725          | 2.66676E-12 | GSDMD     | 0.355          | 0.010814906 |
| ITIH2           | 10.141         | 2.54011E-16 | COMMD1    | 2.267          | 0.057304282 |
| PTMA            | 0.346          | 3.03753E-09 | WIBG      | 0.377          | 0.000314954 |
| SRSF4           | 0.393          | 0.000554565 | TGOLN2    | 0.498          | 0.044004343 |
| S100A16         | 0.488          | 0.001053018 | ATP5D     | 0.48           | 0.003304074 |
| C4A; C4B        | 2.24           | 0.084183746 | ASUN      | 0.399          | 0.00243913  |
| PZP             | 5.315          | 2.54011E-16 | PVR       | 0.306          | 2.47303E-05 |
| TEX10           | 2.642          | 0.003731882 | STAM2     | 0.365          | 0.000666371 |
| MTX2            | 2.038          | 0.020814425 | ARL1      | 0.368          | 0.000731832 |
| A2M             | 11.164         | 2.54011E-16 | HEG1      | 3.027          | 0.010814906 |
| NUP85           | 2.136          | 0.143143237 | ZFP91     | 0.489          | 0.084183746 |
| HMGN1           | 0.309          | 9.94373E-08 | EIF2B2    | 2.861          | 0.001154569 |
| ARL6IP5         | 2.527          | 0.000365112 | SLTM      | 0.481          | 0.055279133 |
| F5              | 3.229          | 1.21763E-06 | SYNE2     | 0.295          | 3.35358E-05 |
| PAPSS1          | 0.46           | 0.016877777 | ADRM1     | 0.415          | 0.004576106 |
| CD99            | 0.46           | 0.017145983 | RBM12     | 2.347          | 0.066174711 |
| RPE             | 2.195          | 0.021719904 | PCNP      | 0.395          | 0.009232784 |
| CRIP2           | 2.151          | 0.167491526 | LRRC20    | 2.243          | 0.119363958 |
| PPP1R9B         | 0.453          | 0.335710472 | TAP2      | 0.455          | 0.043619049 |
| SERINC1         | 0.46           | 0.324249686 | ZC3H4     | 2.016          | 0.207730553 |
| MIF             | 2.394          | 6.64752E-05 | TCEAL3    | 0.329          | 0.027293272 |
| CDC42BPB        | 0.477          | 0.024217601 | FHL2      | 0.459          | 0.02091218  |
| C2orf18         | 0.365          | 0.00231322  | ZNF428    | 0.408          | 0.053754205 |
| TTI1            | 2.181          | 0.164006453 | C11orf83  | 0.264          | 2.65599E-06 |
| JTB             | 0.353          | 0.042886803 | ZNF148    | 0.484          | 0.038006955 |
| CRP             | 3.598          | 4.063E-07   | TRAPPC5   | 2.014          | 0.515643204 |
| FGG             | 3.57           | 0.000282498 | SLAIN2    | 0.453          | 0.040949613 |
| TOMM6           | 0.459          | 0.01328746  | C6orf211  | 2.248          | 0.123682228 |

|      |       |            |      |       |             |
|------|-------|------------|------|-------|-------------|
| CD63 | 0.453 | 0.01534456 | APOM | 2.812 | 0.000122134 |
|------|-------|------------|------|-------|-------------|

11637 OMVs-20µg

| Gene Name | Sample/Control | P-Value     | Gene Name | Sample/Control | P-Value     |
|-----------|----------------|-------------|-----------|----------------|-------------|
| THBS1     | 4.637          | 2.46791E-16 | TGOLN2    | 0.437          | 0.065299903 |
| POSTN     | 10.225         | 2.46791E-16 | PXN       | 0.483          | 0.596091811 |
| SOD1      | 3.502          | 7.44061E-10 | CCDC124   | 0.193          | 2.75872E-07 |
| GSPT2     | 2.41           | 0.019921131 | CDCA2     | 0.461          | 0.492043074 |
| EIF4B     | 0.49           | 0.02162696  | PVR       | 0.352          | 0.014280148 |
| HIST1H2AB | 0.253          | 2.91619E-10 | CPOX      | 2.695          | 0.14669085  |
| TUBB1     | 2.582          | 0.00095506  | SP100     | 0.448          | 0.033782623 |
| LUC7L2    | 0.405          | 0.000689945 | VAMP8     | 0.436          | 0.028528481 |
| SNRNP70   | 0.496          | 0.017076729 | C20orf72  | 3.292          | 0.027458253 |
| LUC7L3    | 0.417          | 0.006922544 | MRPS2     | 0.357          | 0.047909709 |
| IGHM      | 2.791          | 1.23412E-05 | THYN1     | 2.283          | 0.011336179 |
| C3        | 6.288          | 2.46791E-16 | LSM14A    | 0.405          | 0.285762053 |
| HBA2      | 3.048          | 1.15926E-08 | ME1       | 2.595          | 0.025744655 |
| APOB      | 6.074          | 2.46791E-16 | COL6A3    | 2.656          | 0.109236047 |
| F2        | 9.657          | 2.46791E-16 | TOR1A     | 0.482          | 0.51295457  |
| ITIH2     | 21.519         | 2.46791E-16 | NDUFB11   | 0.494          | 0.16532662  |
| PTMA      | 0.469          | 0.010081574 | ZFP91     | 0.432          | 0.382672137 |
| SRSF4     | 0.389          | 0.005120117 | YY1       | 0.496          | 0.102696937 |
| RPL26     | 0.399          | 0.005124665 | MFGE8     | 2.183          | 0.067960392 |
| COQ9      | 0.492          | 0.073662495 | RPL29     | 0.466          | 0.009190835 |
| CD276     | 0.282          | 2.97205E-05 | SLTM      | 0.492          | 0.398653876 |
| BICD2     | 0.421          | 0.042237095 | GBE1      | 2.118          | 0.211397472 |
| LYAR      | 0.475          | 0.045960008 | HMGN3     | 0.404          | 0.345358029 |
| S100A16   | 0.494          | 0.074389791 | PCNP      | 0.44           | 0.200331796 |
| C4A; C4B  | 4.86           | 6.97395E-10 | MRPL47    | 0.448          | 0.181693048 |
| DNAJC21   | 0.499          | 0.275962104 | TMEM41B   | 0.497          | 0.578532294 |
| PZP       | 12.587         | 2.46791E-16 | NUCKS1    | 0.443          | 0.382947769 |
| CHCHD3    | 0.453          | 0.040543958 | CD151     | 0.449          | 0.024184675 |
| A2M       | 22.79          | 2.46791E-16 | CHMP1A    | 0.472          | 0.114491922 |
| HMGN1     | 0.294          | 1.84156E-05 | TCEAL3    | 0.365          | 0.233847642 |
| ARL6IP5   | 2.771          | 0.000132927 | FNBP4     | 0.475          | 0.240603531 |
| EXOSC6    | 0.491          | 0.080133801 | FHL2      | 0.41           | 0.044532985 |
| CHD1      | 0.45           | 0.430693624 | DPM3      | 0.461          | 0.063640097 |
| NAGK      | 2.758          | 0.004216259 | GALK1     | 2.11           | 0.16532662  |
| POLR2D    | 2.214          | 0.021566182 | ABRACL    | 2.217          | 0.253955425 |
| F5        | 4.586          | 5.19541E-11 | C11orf83  | 0.391          | 0.02191007  |
| CD99      | 0.292          | 0.001943186 | AIF1L     | 0.49           | 0.286299753 |
| CRIP2     | 2.401          | 0.013932638 | HP        | 0.446          | 0.023383879 |
| SAAL1     | 0.474          | 0.063640097 | GINS1     | 0.477          | 0.370105716 |

|         |       |             |          |       |             |
|---------|-------|-------------|----------|-------|-------------|
| RRP9    | 0.483 | 0.144164199 | GIPC1    | 0.403 | 0.401233025 |
| VTN     | 2.573 | 9.35852E-06 | C6orf211 | 2.595 | 0.032778929 |
| SUMO2   | 0.364 | 0.000270362 | APOM     | 5.99  | 2.01677E-13 |
| GINS2   | 0.306 | 0.013767337 | PPP4R1   | 0.445 | 0.430693624 |
| MCU     | 2.209 | 0.037487257 | CD63     | 0.291 | 0.001986486 |
| MED4    | 0.499 | 0.172491702 | MED12    | 2.215 | 0.348784093 |
| APOE    | 2.405 | 0.000616613 | COL6A2   | 2.694 | 0.002508855 |
| PDCD4   | 3.366 | 0.035887698 | COA3     | 0.447 | 0.043451094 |
| EMG1    | 2.662 | 6.5677E-05  | WDFY3    | 0.451 | 0.430693624 |
| NGDN    | 0.418 | 0.02444033  | TOMM5    | 0.382 | 0.004216259 |
| COL6A1  | 4.535 | 0.000106918 | ZNF143   | 0.442 | 0.429367461 |
| MECP2   | 0.486 | 0.143286171 | PTMS     | 0.269 | 2.27394E-07 |
| STX16   | 0.274 | 0.098165802 | PPP1R9B  | 0.332 | 0.273137969 |
| ENOPH1  | 5.038 | 3.16978E-10 | SERINC1  | 0.346 | 0.257679428 |
| LAMP2   | 0.489 | 0.061576926 | BRI3BP   | 0.467 | 0.584447655 |
| NHP2L1  | 2.862 | 0.000826783 | C2orf18  | 0.38  | 0.086318645 |
| ARL8B   | 2.568 | 0.001779621 | CHD1L    | 0.349 | 0.351305821 |
| CLPTM1L | 2.02  | 0.03834618  | JTB      | 0.365 | 0.315149165 |
| HBD     | 2.471 | 6.44861E-06 | C11orf10 | 0.453 | 0.044969369 |
| TMA16   | 0.402 | 0.126051115 | CRP      | 3.007 | 3.68272E-05 |
| ASCC2   | 2.087 | 0.376741529 | FGG      | 2.693 | 0.076023956 |
| PUM2    | 0.261 | 0.123123762 | ATP8     | 0.463 | 0.087990513 |
| GSDMD   | 0.452 | 0.293134791 | PLD2     | 0.477 | 0.525280364 |
| LYPLA2  | 3.287 | 0.00145942  | WIBG     | 0.447 | 0.042869927 |
| COMMD1  | 2.696 | 0.007727636 |          |       |             |

11637 OMVs-40µg

| Gene Name | Sample/Control | P-Value     | Gene Name | Sample/Control | P-Value     |
|-----------|----------------|-------------|-----------|----------------|-------------|
| TUBB2A    | 0.473          | 0.05139316  | PCYT1A    | 0.487          | 0.365595446 |
| TCOF1     | 0.488          | 0.044756579 | COL6A1    | 6.475          | 2.92414E-07 |
| THBS1     | 8.308          | 2.53462E-16 | RBM26     | 0.378          | 0.00373699  |
| TPI1      | 2.087          | 0.015542962 | MECP2     | 0.473          | 0.076343672 |
| POSTN     | 13.987         | 2.53462E-16 | HNRNPDL   | 2.094          | 0.303267981 |
| TAGLN2    | 2.127          | 0.01215408  | ENOPH1    | 6.695          | 2.77803E-07 |
| BASP1     | 0.467          | 0.027438655 | FBLN1     | 4.48           | 1.71844E-05 |
| PPIA      | 3.292          | 3.32371E-06 | NHP2L1    | 3.886          | 1.88437E-05 |
| EIF4B     | 0.482          | 0.039476032 | HBD       | 4.334          | 3.14433E-09 |
| EBNA1BP2  | 0.386          | 0.001637815 | EXOSC2    | 2.108          | 0.311063051 |
| HIST1H2AB | 0.202          | 5.13717E-10 | PPIF      | 2.524          | 0.093641984 |
| TUBB1     | 4.821          | 2.02671E-07 | CARHSP1   | 2.759          | 0.004475394 |
| ALDOC     | 2.106          | 0.013723852 | GSDMD     | 0.234          | 0.001407632 |
| FN1       | 2.187          | 0.013473063 | SRA1      | 2.443          | 0.062155596 |
| LUC7L2    | 0.292          | 6.28355E-06 | TMSB4X    | 2.195          | 0.141378369 |

|          |        |             |          |       |             |
|----------|--------|-------------|----------|-------|-------------|
| SNRNP70  | 0.385  | 0.001527264 | WIBG     | 0.452 | 0.039476032 |
| LUC7L3   | 0.334  | 0.000361972 | FABP5    | 2.489 | 0.01412194  |
| KPNA1    | 0.393  | 0.006008638 | SUMO1    | 0.489 | 0.053468397 |
| IGHM     | 4.658  | 9.82744E-09 | BOLA2B   | 2.284 | 0.100492286 |
| PFN1     | 2.073  | 0.016991197 | EML2     | 2.202 | 0.166007139 |
| SRSF6    | 0.48   | 0.038940999 | CCDC124  | 0.283 | 0.000399243 |
| C3       | 12.505 | 2.53462E-16 | ASUN     | 0.394 | 0.022974027 |
| HBA2     | 6.023  | 1.2247E-13  | PVR      | 0.304 | 0.001528094 |
| APOB     | 14.002 | 2.53462E-16 | PLG      | 3.098 | 0.0040839   |
| F2       | 21.388 | 2.53462E-16 | VAMP8    | 0.465 | 0.039107485 |
| LGALS1   | 2.19   | 0.007912014 | B4GALT1  | 3.955 | 0.001957416 |
| DDX50    | 2.104  | 0.095315707 | STAM2    | 0.382 | 0.01708079  |
| SRRM1    | 0.353  | 0.001078883 | ARL1     | 0.291 | 0.000721756 |
| BANF1    | 2.181  | 0.012095015 | MRPS9    | 2.021 | 0.274158    |
| ITIH2    | 31.074 | 2.53462E-16 | SRSF9    | 2.08  | 0.126101949 |
| PTMA     | 0.311  | 2.5714E-05  | ARL3     | 2.082 | 0.146854275 |
| SRSF4    | 0.409  | 0.016254273 | SDC2     | 0.428 | 0.065268771 |
| TOR1AIP2 | 0.472  | 0.042071024 | ACBD5    | 0.414 | 0.039476032 |
| TXN      | 2.245  | 0.005379032 | TXNDC17  | 2.121 | 0.122444234 |
| PRDX5    | 2.626  | 0.003938046 | C20orf72 | 2.16  | 0.440659443 |
| CPS1     | 0.465  | 0.320155159 | ARL6IP1  | 0.412 | 0.012013821 |
| BICD2    | 0.426  | 0.055234551 | NUB1     | 2.085 | 0.292693689 |
| RNPS1    | 0.448  | 0.022299495 | EPN2     | 2.576 | 0.007669184 |
| LYAR     | 0.436  | 0.018394834 | THYN1    | 2.219 | 0.092817017 |
| CUTA     | 2.126  | 0.045965539 | COL6A3   | 2.922 | 0.142852861 |
| S100A16  | 0.482  | 0.064090128 | HEG1     | 2.431 | 0.178336624 |
| LRP1     | 2.682  | 0.00964675  | MFGE8    | 2.841 | 0.023588442 |
| C4A; C4B | 5.587  | 3.55892E-09 | SLIRP    | 2.629 | 0.021576797 |
| ATP5H    | 2.429  | 0.061472892 | SCAMP2   | 0.436 | 0.026596032 |
| FHOD1    | 2.007  | 0.221050347 | GBE1     | 2.664 | 0.089051842 |
| PZP      | 22.505 | 2.53462E-16 | SURF6    | 0.462 | 0.082742527 |
| TEX10    | 2      | 0.329970395 | PCNP     | 0.449 | 0.069603019 |
| CBR3     | 2.201  | 0.352904712 | BUD13    | 0.489 | 0.122444234 |
| HNRNPLL  | 2.774  | 0.052291176 | CPNE2    | 2.28  | 0.282248363 |
| FAF1     | 0.472  | 0.383021968 | TCEAL3   | 0.308 | 0.013566006 |
| A2M      | 44.58  | 2.53462E-16 | GALK1    | 3.28  | 0.009952996 |
| NUP85    | 2.78   | 0.085910088 | ABRACL   | 2.301 | 0.264667302 |
| HMGNI    | 0.412  | 0.012564195 | SDHB     | 2.123 | 0.106238688 |
| SRSF11   | 0.417  | 0.013583519 | C11orf83 | 0.35  | 0.007155428 |
| MTAP     | 2.002  | 0.168278518 | ZNF148   | 0.313 | 0.002163753 |
| ITGB3    | 2.338  | 0.030992752 | COASY    | 2.249 | 0.26574639  |
| ARL6IP5  | 2.003  | 0.169280754 | HP       | 0.471 | 0.055561752 |
| AK1      | 2.109  | 0.134760929 | PPIG     | 0.411 | 0.021525529 |
| TGFBI    | 4.213  | 1.48527E-06 | DNAJC3   | 0.317 | 0.029652868 |

|         |       |             |          |       |             |
|---------|-------|-------------|----------|-------|-------------|
| EXOSC5  | 2.123 | 0.212256117 | C6orf211 | 2.246 | 0.26574639  |
| F5      | 9.34  | 2.53462E-16 | APOM     | 7.274 | 5.59722E-15 |
| NUBP1   | 0.489 | 0.128855655 | NLRP13   | 0.448 | 0.024862856 |
| SEC24A  | 2.476 | 0.068829392 | MED12    | 3.504 | 0.015889381 |
| STX4    | 2.479 | 0.001070814 | GGA2     | 2.608 | 0.001728342 |
| CD99    | 0.42  | 0.050773632 | CLIC3    | 0.381 | 0.180915161 |
| RPE     | 2.566 | 0.020114815 | COL6A2   | 3.438 | 0.001076975 |
| CRIP2   | 3.194 | 0.004511872 | CCBL1    | 3.349 | 0.095315707 |
| TNS3    | 2.589 | 0.083711495 | TOMM5    | 0.424 | 0.01481271  |
| VTN     | 7.348 | 2.53462E-16 | SERINC1  | 0.367 | 0.108986058 |
| RPA3    | 2.142 | 0.074616284 | KATNB1   | 2.045 | 0.399185729 |
| GPATCH4 | 0.48  | 0.102476371 | MIF      | 2.135 | 0.039476032 |
| SRSF10  | 0.496 | 0.088651815 | C2orf18  | 0.448 | 0.067819083 |
| SUMO2   | 0.443 | 0.016215416 | JTB      | 0.434 | 0.194227657 |
| AGRN    | 0.459 | 0.087616467 | CRP      | 3.535 | 5.63113E-05 |
| MCU     | 3.143 | 0.004540052 | FGG      | 5.152 | 2.12831E-05 |
| APOE    | 6.416 | 8.06287E-12 | ATP8     | 0.496 | 0.105413447 |

Table S2. Differentially expressed proteins in GES1 cocultured with increasing concentrations of 11637 (1:1, 10:1 or 50:1).

11637 – 1:1

| Gene Name | Sample/Control | P-Value     | Gene Name | Sample/Control | P-Value     |
|-----------|----------------|-------------|-----------|----------------|-------------|
| TUBB4A    | 2.563          | 0.001636127 | TRMT112   | 2.506          | 0.003933575 |
| SOD1      | 2.265          | 0.002328304 | ASNS      | 2.586          | 0.005455191 |
| KRT1      | 0.476          | 0.000783436 | TMEM41B   | 0.455          | 0.015256005 |
| KRT2      | 0.398          | 1.93021E-05 | ENOPH1    | 3.264          | 0.00025588  |
| KRT10     | 0.492          | 0.001568935 | SCLY      | 2.346          | 0.022493246 |
| KRT9      | 0.472          | 0.000586587 | C14orf142 | 2.431          | 0.029756413 |
| ANP32E    | 2.232          | 0.007579912 | TPRKB     | 2.179          | 0.043262502 |
| PEA15     | 2.089          | 0.020149966 | CFDP1     | 2.227          | 0.019567008 |
| HADH      | 0.478          | 0.002460814 | VMP1      | 2.324          | 0.066039552 |
| RPLP1     | 2.064          | 0.021302861 | UBE2A     | 2.55           | 0.015495944 |
| NUBP2     | 2.319          | 0.008704554 | ABRACL    | 2.106          | 0.059979409 |
| TRIP10    | 2.152          | 0.053415234 | MT2A      | 0.454          | 0.010182337 |
| FAM98B    | 2.358          | 0.005973634 | GRWD1     | 2.446          | 0.010925165 |
| HIST2H2AB | 3.39           | 8.86095E-08 | SPATA5    | 2.612          | 0.007579912 |
| GPKOW     | 2.305          | 0.027241186 | MMGT1     | 0.413          | 0.012094607 |
| EXOSC5    | 3.058          | 0.000868632 | C2orf18   | 0.461          | 0.007430037 |
| HMBS      | 2.051          | 0.082087534 | SIRT1     | 2.41           | 0.024010425 |
| STK39     | 2.096          | 0.077549919 | SELENOT   | 2.52           | 0.027074026 |
| SCAF11    | 5.17           | 8.28015E-07 | SNRPGP15  | 2.091          | 0.036707581 |
| FGFR1OP   | 2.104          | 0.072114251 | UBR7      | 2.038          | 0.183789676 |

|       |       |             |          |       |             |
|-------|-------|-------------|----------|-------|-------------|
| WAPAL | 2.009 | 0.101278653 | RNASEH2C | 2.127 | 0.059945075 |
| BAG5  | 2.876 | 0.008407002 | MRPS14   | 0.459 | 0.059140438 |
| SAP18 | 0.46  | 0.001596268 | TRMT1    | 3.155 | 0.01221736  |
| SURF6 | 2.006 | 0.101278653 | OGFOD1   | 2.101 | 0.217944774 |
| SCNM1 | 2.056 | 0.457807234 | HYPK     | 2.515 | 0.169408233 |
| TOMM5 | 0.398 | 0.001157311 | EIF1     | 2.118 | 0.066039552 |

11637 – 10:1

| Gene Name | Sample/Control | P-Value     | Gene Name | Sample/Control | P-Value     |
|-----------|----------------|-------------|-----------|----------------|-------------|
| TOP2A     | 0.491          | 0.194752728 | COL1A1    | 0.284          | 0.018790632 |
| TUBB4A    | 3.319          | 0.00852822  | ATAD2     | 0.448          | 0.366341164 |
| RRBP1     | 0.467          | 0.139317668 | KMT2A     | 0.419          | 0.274987228 |
| RNH1      | 2.071          | 0.374790261 | STX7      | 0.496          | 0.466243739 |
| GLG1      | 0.431          | 0.098662457 | FADD      | 2.376          | 0.210310864 |
| HLA-B     | 0.486          | 0.181793272 | STK39     | 2.573          | 0.094688691 |
| KRT1      | 0.273          | 0.000559629 | COL18A1   | 0.482          | 0.462991197 |
| EIF5A     | 2.046          | 0.399580757 | RP2       | 0.451          | 0.39609311  |
| EEF1D     | 2.137          | 0.321955335 | GBAS      | 0.486          | 0.483153592 |
| KRT2      | 0.348          | 0.00924834  | RHOT1     | 0.493          | 0.546694279 |
| KRT10     | 0.334          | 0.006419149 | ALDH5A1   | 0.481          | 0.510760394 |
| KRT9      | 0.33           | 0.005558622 | TMEM165   | 0.478          | 0.453032586 |
| RPLP2     | 2.16           | 0.306136334 | POSTN     | 4.002          | 0.004046496 |
| ZYX       | 2.08           | 0.366633027 | COL4A1    | 0.479          | 0.449019834 |
| ICAM1     | 0.472          | 0.149615403 | SCAF11    | 4.271          | 0.021549445 |
| NAP1L1    | 2.281          | 0.224796357 | HSBP1     | 2.096          | 0.331993345 |
| KIF23     | 0.491          | 0.355396006 | F11R      | 0.32           | 0.025000736 |
| L1CAM     | 0.382          | 0.080784739 | BAG5      | 2.997          | 0.040106351 |
| LAMA5     | 0.492          | 0.500787356 | EIF1      | 2.16           | 0.308644739 |
| TPM3      | 2.076          | 0.369241424 | TRMT112   | 2.688          | 0.082093969 |
| MFI2      | 0.468          | 0.284413361 | LSM1      | 2.058          | 0.379773102 |
| ACSF2     | 0.453          | 0.223248663 | ASNS      | 2.891          | 0.046333643 |
| BCAM      | 0.361          | 0.056794479 | F2        | 3.271          | 0.013944572 |
| SMARCA1   | 0.495          | 0.503286128 | BCAT1     | 2.198          | 0.254770554 |
| ANP32E    | 2.238          | 0.247062976 | ENOPH1    | 4.492          | 0.000805952 |
| EEF1B2    | 2.628          | 0.080784739 | FHL3      | 2.062          | 0.400132421 |
| BTF3      | 2.151          | 0.29428723  | C14orf142 | 2.494          | 0.137482455 |
| WARS      | 2.365          | 0.18025845  | TPRKB     | 2.219          | 0.258673762 |
| ADNP      | 0.413          | 0.180710031 | CCDC124   | 2.188          | 0.289734887 |
| LRP1      | 0.386          | 0.140121739 | SSSCA1    | 2.033          | 0.408233137 |
| SQSTM1    | 3.079          | 0.018701643 | CXorf26   | 2.015          | 0.39614836  |
| HIST1H2AG | 0.42           | 0.058059755 | CD46      | 0.443          | 0.311677063 |
| OAT       | 0.335          | 0.035177858 | ZNF622    | 2.358          | 0.192087391 |

|           |       |             |           |        |             |
|-----------|-------|-------------|-----------|--------|-------------|
| PEA15     | 3.084 | 0.019724159 | INTS1     | 0.462  | 0.366341164 |
| ALDH6A1   | 0.418 | 0.143580229 | FAM129A   | 2.014  | 0.435850986 |
| LGALS3BP  | 0.465 | 0.331989308 | APOA1     | 2.283  | 0.204369545 |
| HLTF      | 0.442 | 0.312636214 | KLC4      | 3.661  | 0.004973877 |
| HIST1H1A  | 0.495 | 0.381894182 | YME1L1    | 0.442  | 0.341096283 |
| RFC1      | 0.43  | 0.260640124 | CMSS1     | 2.37   | 0.182624879 |
| RACGAP1   | 0.453 | 0.22621357  | UBE2A     | 5.126  | 0.000280596 |
| HIST1H2AB | 0.478 | 0.161853021 | SPTLC2    | 0.451  | 0.400132421 |
| RBMXL1    | 3.986 | 0.001798734 | GRWD1     | 3.146  | 0.021513799 |
| BOLA2B    | 2.295 | 0.174940451 | GLA       | 0.436  | 0.317087371 |
| HADH      | 0.462 | 0.182873924 | PTTG1IP   | 0.353  | 0.05505758  |
| PSIP1     | 0.485 | 0.222200442 | SPATA5    | 2.471  | 0.147248203 |
| UBXN1     | 2.04  | 0.354709879 | UBFD1     | 2.187  | 0.280406921 |
| TPT1      | 2.241 | 0.239154093 | MDK       | 2.755  | 0.073147608 |
| HBA2      | 3.42  | 0.006701074 | MRPL50    | 2.407  | 0.140121739 |
| GOLM1     | 0.454 | 0.302987498 | CPD       | 4.155  | 0.001620853 |
| SOD2      | 0.434 | 0.075837209 | MRPL13    | 2.018  | 0.491107614 |
| PYGB      | 2.637 | 0.092574481 | COMMD3    | 3.147  | 0.027928142 |
| RPLP1     | 2.602 | 0.089927843 | COX7A2    | 0.484  | 0.458943672 |
| CDKN2A    | 2.378 | 0.159997672 | ITIH2     | 2.252  | 0.24583407  |
| SLIRP     | 0.419 | 0.093952807 | HBD       | 2.679  | 0.069292564 |
| HIBCH     | 0.486 | 0.336999576 | SIRT1     | 2.049  | 0.630748286 |
| CD9       | 0.492 | 0.204369545 | UBE2H     | 2.761  | 0.062613702 |
| NTMT1     | 2.22  | 0.23581039  | C12orf5   | 2.869  | 0.052858835 |
| NUBP2     | 3.119 | 0.023746728 | CORO7     | 5.86   | 0.000110934 |
| TRIP10    | 2.52  | 0.126822413 | GPX8      | 0.475  | 0.427944931 |
| HBG1      | 4.589 | 0.000263403 | SPARC     | 32.308 | 1.70643E-16 |
| CYR61     | 2.316 | 0.170307752 | SELT      | 2.628  | 0.151216576 |
| GLYR1     | 0.481 | 0.503286128 | GNPNAT1   | 2.265  | 0.523621901 |
| FAM98B    | 2.145 | 0.311677063 | LPCAT2    | 0.43   | 0.254352903 |
| NUSAP1    | 0.462 | 0.336508066 | RNASEH2C  | 2.236  | 0.280406921 |
| ADAM10    | 0.488 | 0.487772174 | TRMT1     | 2.813  | 0.291863021 |
| COL5A1    | 0.291 | 0.026165993 | GEMIN4    | 2.157  | 0.317044246 |
| SDSL      | 2.4   | 0.181793272 | UHRF1     | 2.461  | 0.136849687 |
| NUDCD1    | 2.295 | 0.247062976 | PPIC      | 0.499  | 0.551722702 |
| UCHL3     | 2.361 | 0.191996342 | CNPY4     | 0.417  | 0.284413361 |
| GNB4      | 0.453 | 0.369161332 | SARM1     | 2.142  | 0.614389556 |
| ACADM     | 0.484 | 0.341096283 | MAN1B1    | 0.483  | 0.523621901 |
| NDUFA7    | 0.443 | 0.239525197 | SCNM1     | 3.617  | 0.013626622 |
| METAP2    | 2.929 | 0.047262741 | CBS       | 2.34   | 0.222200442 |
| PURA      | 2.041 | 0.369241424 | PLSCR1    | 0.477  | 0.470605164 |
| PSPH      | 2.35  | 0.157230563 | MGST3     | 3.482  | 0.013626622 |
| HIST2H2AB | 2.503 | 0.121517428 | HYPK      | 2.717  | 0.30500444  |
| VTN       | 2.057 | 0.388669812 | NIPSNAP3A | 0.488  | 0.496754578 |



|         |       |             |          |       |             |
|---------|-------|-------------|----------|-------|-------------|
| SPTLC1  | 0.404 | 0.222200442 | BKPyVgp5 | 0.448 | 0.223248663 |
| DNAJC10 | 0.429 | 0.287866017 | APOM     | 2.281 | 0.252692906 |
| PRC1    | 0.474 | 0.491107614 | ARSB     | 0.336 | 0.072433898 |
| POLR2D  | 2.017 | 0.439760059 | DIRAS2   | 2.929 | 0.024892488 |
| ISG15   | 3.669 | 0.003460969 | TP53I3   | 3.933 | 0.003306742 |

11637 – 50:1

| Gene Name | Sample/Control | P-Value     | Gene Name | Sample/Control | P-Value     |
|-----------|----------------|-------------|-----------|----------------|-------------|
| MKI67     | 0.473          | 0.189088197 | VRK1      | 2.093          | 0.254357492 |
| TOP2A     | 0.482          | 0.210312159 | COL4A1    | 0.389          | 0.16815419  |
| TUBB4A    | 3.632          | 0.004473899 | SCAF11    | 4.755          | 0.038637368 |
| RRBP1     | 0.373          | 0.039568285 | FTO       | 0.492          | 0.452013914 |
| SMC3      | 0.495          | 0.240292534 | NUBP1     | 2.024          | 0.483496801 |
| HSD17B4   | 0.484          | 0.213806363 | THBS1     | 5.227          | 0.00038749  |
| GLG1      | 0.399          | 0.066534472 | BCL2L13   | 0.469          | 0.396339377 |
| SOD1      | 2.37           | 0.109701795 | CECR5     | 2.523          | 0.170631112 |
| SUN1      | 0.48           | 0.203916615 | WAPAL     | 5.008          | 0.008820644 |
| KRT1      | 0.499          | 0.250698403 | F11R      | 0.445          | 0.22864345  |
| BASP1     | 0.411          | 0.082482215 | BAG5      | 4.914          | 0.006889644 |
| EIF5A     | 2.259          | 0.146487123 | SAP18     | 0.171          | 1.21775E-05 |
| EEF1D     | 2.171          | 0.181533948 | PAFAH1B2  | 2.274          | 0.189088197 |
| KRT2      | 0.309          | 0.007832377 | EIF1      | 3.751          | 0.011591112 |
| HINT1     | 2.083          | 0.224988058 | ERMP1     | 0.445          | 0.286428846 |
| KRT10     | 0.349          | 0.023008053 | TRMT112   | 3.327          | 0.020615974 |
| MRC2      | 0.474          | 0.190681978 | XPO7      | 2.375          | 0.131250297 |
| RPLP2     | 2.185          | 0.175142826 | ASNS      | 4.129          | 0.003693454 |
| HLA-C     | 0.482          | 0.325557682 | VBP1      | 2.493          | 0.095360072 |
| ICAM1     | 0.423          | 0.099841193 | TMEM41B   | 0.239          | 0.00473945  |
| NAP1L1    | 2.868          | 0.026474556 | F2        | 8.474          | 6.19384E-07 |
| AK1       | 2.327          | 0.123234023 | BCAT1     | 2.563          | 0.10940017  |
| L1CAM     | 0.397          | 0.067627822 | ENOPH1    | 4.422          | 0.005139039 |
| ALDOC     | 2.299          | 0.131594342 | DUSP12    | 2.578          | 0.275175204 |
| LAMA5     | 0.36           | 0.066534472 | C14orf142 | 2.974          | 0.142502783 |
| MFI2      | 0.354          | 0.026263481 | SQRDL     | 5.903          | 1.54942E-05 |
| ACSF2     | 0.358          | 0.028301249 | CD40      | 0.291          | 0.036372852 |
| BCAM      | 0.173          | 1.0158E-05  | EIF2D     | 2.077          | 0.543954158 |
| HDAC1     | 0.467          | 0.177054097 | CCDC124   | 5.367          | 8.30104E-05 |
| MDC1      | 0.488          | 0.291670248 | AK4       | 0.391          | 0.203110032 |
| CTSB      | 0.404          | 0.073428945 | EPS8L2    | 2.068          | 0.23248703  |
| SMARCA1   | 0.474          | 0.348926176 | SSSCA1    | 2.121          | 0.329936805 |
| ANP32E    | 2.477          | 0.082062757 | CD46      | 0.435          | 0.198931692 |
| NME1      | 2.023          | 0.2610266   | ACOT13    | 0.474          | 0.338237115 |
| MYL6      | 2.002          | 0.274230726 | CDK6      | 2.578          | 0.350230109 |

|           |        |             |          |        |             |
|-----------|--------|-------------|----------|--------|-------------|
| HSDL2     | 0.478  | 0.199859729 | MRPS12   | 0.354  | 0.106465993 |
| EEF1B2    | 2.695  | 0.043777588 | ZNF622   | 2.651  | 0.149758903 |
| BTF3      | 3.293  | 0.007478773 | RCOR1    | 2.676  | 0.06015733  |
| ACAD9     | 0.431  | 0.112008203 | CASP8    | 2.838  | 0.269553857 |
| RRM1      | 0.437  | 0.185964366 | FSTL1    | 4.474  | 0.001927829 |
| WARS      | 2.406  | 0.09970624  | C20orf72 | 0.442  | 0.37262841  |
| ADNP      | 0.448  | 0.228749974 | GNL1     | 0.355  | 0.146914871 |
| LRP1      | 0.336  | 0.054751739 | F5       | 2.036  | 0.252572942 |
| CTSC      | 0.464  | 0.173323134 | NUF2     | 0.463  | 0.375540171 |
| FAM50A    | 2.072  | 0.23004399  | ZNF259   | 2.435  | 0.19700346  |
| SQSTM1    | 5.278  | 6.07335E-05 | C3       | 5.702  | 0.000191857 |
| ANP32B    | 2.017  | 0.264756579 | FAM129A  | 2.199  | 0.168370101 |
| HP1BP3    | 0.444  | 0.133769435 | KDSR     | 0.369  | 0.161181058 |
| HIST1H2AG | 0.454  | 0.151706006 | ATXN10   | 0.498  | 0.464761983 |
| OAT       | 0.334  | 0.037796972 | PEX14    | 0.356  | 0.125933996 |
| PEA15     | 3.499  | 0.004388112 | APOA1    | 3.632  | 0.002668617 |
| SRM       | 2.017  | 0.237660947 | ZCCHC8   | 2.97   | 0.142502783 |
| ALDH6A1   | 0.422  | 0.123786691 | PCYT1A   | 2.333  | 0.468459015 |
| PXDN      | 0.416  | 0.133214841 | SCPEP1   | 0.475  | 0.41793089  |
| HIST1H1B  | 0.461  | 0.165923464 | NOL11    | 8.999  | 2.42104E-06 |
| ITGA3     | 0.462  | 0.168031121 | PFDN1    | 3.328  | 0.018023399 |
| HLTF      | 0.423  | 0.225068314 | IGBP1    | 4.439  | 0.024808346 |
| HIST1H1A  | 0.34   | 0.021714532 | KLC4     | 6.438  | 0.000620648 |
| HIST1H1D  | 0.493  | 0.233618313 | BZW1     | 12.235 | 5.32178E-10 |
| RFC1      | 0.482  | 0.37412792  | NEDD4    | 2.007  | 0.625157994 |
| RACGAP1   | 0.393  | 0.06371909  | OCIAD2   | 0.386  | 0.172173675 |
| CD81      | 0.497  | 0.246438889 | PIP4K2B  | 2.393  | 0.333865003 |
| RBMXL1    | 23.245 | 1.09677E-16 | VMP1     | 4.191  | 0.024571052 |
| NPM3      | 3.502  | 0.008394335 | UBE2A    | 2.202  | 0.338237115 |
| ATP6V1B2  | 3.157  | 0.009937736 | MRPS17   | 0.469  | 0.372250037 |
| GNAI1     | 0.415  | 0.145468891 | NUB1     | 2.383  | 0.241180163 |
| MAP2K2    | 2.335  | 0.159482965 | ABRACL   | 2.337  | 0.203916615 |
| SUN2      | 0.372  | 0.101050023 | COX2     | 0.492  | 0.232952093 |
| ATAD1     | 0.447  | 0.265530123 | MT2A     | 0.395  | 0.131155612 |
| HADH      | 0.268  | 0.002196955 | SPTLC2   | 0.2    | 0.002988855 |
| PSIP1     | 0.454  | 0.151706006 | NVL      | 0.462  | 0.377892427 |
| TPT1      | 2.465  | 0.084637527 | GGCX     | 2.915  | 0.052014505 |
| CPT2      | 0.493  | 0.361884961 | PPP1R9B  | 10.163 | 1.54461E-08 |
| HSP90AB4P | 2.576  | 0.352597273 | GRWD1    | 4.267  | 0.002668617 |
| HBA2      | 8.969  | 1.54461E-08 | HMG3     | 0.176  | 0.001131875 |
| IVD       | 0.43   | 1.54461E-08 | TIMM17B  | 0.438  | 0.365670695 |
| TNS3      | 2.441  | 0.082824859 | DDTL     | 3.262  | 0.047003594 |
| TXN       | 2.258  | 0.146827752 | SLC39A7  | 0.182  | 0.001466224 |
| GOLM1     | 0.48   | 0.306917531 | NDUFS4   | 0.487  | 0.376772678 |

|         |        |             |           |        |             |
|---------|--------|-------------|-----------|--------|-------------|
| SOD2    | 0.386  | 0.051670469 | CD99      | 0.323  | 0.084697696 |
| PYGB    | 8.415  | 2.85884E-08 | ENSA      | 2.046  | 0.268735545 |
| RPLP1   | 2.895  | 0.024554153 | ALG5      | 2.731  | 0.183857851 |
| SRSF11  | 2.224  | 0.16815419  | NDUFA4    | 0.499  | 0.370702782 |
| DDX50   | 0.4    | 0.131341918 | PTTG1IP   | 0.276  | 0.005399023 |
| CDKN2A  | 2.778  | 0.032442606 | SPATA5    | 4.34   | 0.005446593 |
| BRD3    | 0.354  | 0.101050023 | CYP51A1   | 2.924  | 0.055052385 |
| SLIRP   | 0.437  | 0.122921409 | MDK       | 4.302  | 0.028280324 |
| TTC1    | 2.077  | 0.210312159 | ADRM1     | 0.462  | 0.38233219  |
| B2M     | 0.434  | 0.118113311 | MMGT1     | 2.205  | 0.205150973 |
| HIBCH   | 0.495  | 0.285019853 | MRPL50    | 3.356  | 0.007725908 |
| PRKAR2A | 6.308  | 0.000144025 | ARMC10    | 0.489  | 0.443367379 |
| CD9     | 0.442  | 0.131155612 | ELOVL1    | 0.347  | 0.118143192 |
| NTMT1   | 2.249  | 0.136464134 | UBE2L6    | 2.043  | 0.525113948 |
| NUBP2   | 3.117  | 0.030752614 | MAP1LC3B2 | 2.398  | 0.126388524 |
| ASPH    | 0.493  | 0.356258174 | CPD       | 17.706 | 3.12987E-14 |
| SPR     | 2.007  | 0.3144212   | COMMD3    | 43.371 | 1.09677E-16 |
| TRIP10  | 2.435  | 0.188360333 | OCIAD1    | 14.319 | 1.04034E-12 |
| HBG1    | 42.085 | 1.09677E-16 | SPAG7     | 0.479  | 0.468230204 |
| PCBP3   | 3.489  | 0.004737053 | ACOT8     | 0.448  | 0.356258174 |
| CYR61   | 3.423  | 0.005249522 | SPC25     | 19.561 | 5.64173E-13 |
| FAM98B  | 2.471  | 0.134320793 | GBP1      | 2.424  | 0.423480407 |
| NUSAP1  | 0.408  | 0.151706006 | SUMO2     | 0.221  | 0.000439378 |
| IPO9    | 2.005  | 0.27712613  | COX7A2    | 0.41   | 0.148129676 |
| ADAM10  | 0.456  | 0.28570139  | C2orf18   | 0.367  | 0.131155612 |
| DNAJC2  | 3.093  | 0.020290851 | WDR77     | 2.07   | 0.290303182 |
| SDSL    | 2.079  | 0.360258361 | TMEM65    | 0.426  | 0.201043677 |
| CTSZ    | 0.411  | 0.121798244 | ITIH2     | 4.224  | 0.001796945 |
| LUC7L   | 3.678  | 0.005965014 | PIR       | 9.813  | 6.75129E-06 |
| UCHL3   | 2.58   | 0.101671973 | FIP1L1    | 2.165  | 0.343080484 |
| HMGNI   | 0.297  | 0.016049093 | CRLF3     | 3.726  | 0.07021232  |
| UBXN4   | 0.347  | 0.06015733  | PPHLN1    | 0.484  | 0.420465512 |
| ATP5L   | 0.476  | 0.196573924 | CASP3     | 4.3    | 0.005794428 |
| GNB4    | 0.268  | 0.01628031  | TACC3     | 2.026  | 0.63773296  |
| PURB    | 2.075  | 0.269935781 | HBD       | 5.772  | 1.37618E-05 |
| PLG     | 2.424  | 0.095143894 | SNRPE     | 0.447  | 0.281344414 |
| ACADM   | 0.391  | 0.066534472 | SLC25A15  | 2.139  | 0.227135409 |
| KDM1A   | 0.413  | 0.219550346 | MRGBP     | 19.476 | 9.40551E-13 |
| TAP2    | 0.45   | 0.278254859 | ABHD12    | 0.493  | 0.233618313 |
| NDUFA7  | 0.265  | 0.004249922 | PYCR1     | 11.169 | 6.47383E-07 |
| CCNB1   | 0.415  | 0.204668697 | SIRT1     | 3.308  | 0.093641563 |
| METAP2  | 2.876  | 0.054629482 | LSM6      | 14.501 | 1.73791E-12 |
| STK24   | 2.001  | 0.443862304 | C19orf43  | 2.426  | 0.283295033 |
| ADAM9   | 0.472  | 0.323993614 | UBE2H     | 3.733  | 0.049904847 |

|           |        |             |          |        |             |
|-----------|--------|-------------|----------|--------|-------------|
| GLB1      | 0.374  | 0.166833761 | ATP5I    | 0.414  | 0.08912228  |
| PSPH      | 2.517  | 0.095674429 | SAP130   | 0.353  | 0.101651479 |
| MRPS18B   | 0.462  | 0.376132855 | CADM4    | 0.368  | 0.161181058 |
| HSPA14    | 2.032  | 0.318478314 | MRPL27   | 0.318  | 0.141277604 |
| HSP90AA4P | 3.992  | 0.005591175 | ECHDC1   | 6.507  | 0.000221329 |
| MAVS      | 0.471  | 0.226217251 | DPM3     | 0.419  | 0.190681978 |
| HIST2H2AB | 4.225  | 0.000677566 | SELT     | 5.41   | 0.002669445 |
| VTN       | 3.44   | 0.005166197 | KANK2    | 2.672  | 0.329937506 |
| IGSF8     | 0.446  | 0.310728377 | LTF      | 2.583  | 0.079553967 |
| RPE       | 2.149  | 0.299104883 | GNPNAT1  | 3.847  | 0.101671973 |
| SPTLC1    | 0.366  | 0.117172209 | USP28    | 0.464  | 0.434246664 |
| ENG       | 0.419  | 0.239453438 | PROCR    | 0.465  | 0.377501833 |
| DNAJC10   | 0.492  | 0.434176552 | NDUFB5   | 0.391  | 0.190681978 |
| MBNL1     | 2.269  | 0.185048166 | FAM169A  | 2.308  | 0.344120951 |
| GNG12     | 0.472  | 0.18793691  | ANAPC7   | 0.383  | 0.217389892 |
| H1FO      | 0.251  | 0.001085238 | TRMT1    | 4.693  | 0.040291581 |
| FAM3C     | 0.457  | 0.227336037 | MRPL19   | 0.495  | 0.4633305   |
| PRC1      | 0.46   | 0.348926176 | FAH      | 0.392  | 0.29710282  |
| CRAT      | 10.919 | 4.84978E-10 | GEMIN4   | 2.044  | 0.408088648 |
| CHTOP     | 0.466  | 0.175680465 | LRRC8A   | 9.991  | 2.46178E-06 |
| CLPTM1L   | 2.298  | 0.190681978 | CBX8     | 3.481  | 0.076066009 |
| POLR1A    | 2.553  | 0.175376202 | UHRF1    | 3.848  | 0.003597315 |
| FAHD1     | 2.189  | 0.23004399  | DBR1     | 2.608  | 0.127849979 |
| CAT       | 0.422  | 0.181004237 | PPIC     | 0.42   | 0.257973675 |
| TP53I3    | 4.762  | 0.000942238 | TCEAL4   | 0.283  | 0.050729444 |
| EXOSC5    | 2.086  | 0.375135201 | CNPY4    | 0.421  | 0.203807379 |
| HMBS      | 2.535  | 0.334793001 | GMNN     | 2.169  | 0.375135201 |
| MME       | 2.049  | 0.35009014  | MAN1B1   | 0.496  | 0.464761983 |
| TUBG1     | 10.423 | 3.46852E-08 | SCNM1    | 13.535 | 7.75746E-07 |
| FTH1      | 0.463  | 0.37283547  | DIDO1    | 4.981  | 0.000516176 |
| RALA      | 0.472  | 0.190681978 | CBS      | 2.071  | 0.563686229 |
| MRPS36    | 0.38   | 0.102107829 | CLNS1A   | 2.268  | 0.192756786 |
| NUPL1     | 0.463  | 0.259310298 | S100A6   | 0.459  | 0.161943741 |
| KIF20A    | 0.453  | 0.361884961 | FAM114A2 | 6.245  | 0.00023801  |
| COL1A1    | 0.21   | 0.00206424  | PLSCR1   | 0.334  | 0.096361852 |
| SLC44A1   | 0.491  | 0.23004399  | POLR1B   | 0.482  | 0.303057841 |
| MNAT1     | 2.393  | 0.35009014  | MGST3    | 26.011 | 1.09677E-16 |
| IPO4      | 2.611  | 0.076485535 | PIN4     | 0.453  | 0.356258174 |
| GTF2E2    | 2.499  | 0.190681978 | ITIH3    | 2.028  | 0.609268141 |
| VAMP3     | 0.491  | 0.345877537 | HYPK     | 3.871  | 0.112391578 |
| LACTB     | 2.114  | 0.178128054 | UBLCP1   | 2.978  | 0.109965807 |
| CUL2      | 2.247  | 0.151118096 | A2M      | 2.112  | 0.314809785 |
| FANCI     | 0.272  | 0.024437304 | BKPyVgp5 | 0.295  | 0.007249227 |
| ATXN2     | 4.38   | 0.001055156 | NKAP     | 2.235  | 0.203232664 |

|         |       |             |         |        |             |
|---------|-------|-------------|---------|--------|-------------|
| STX7    | 0.472 | 0.259305904 | APOH    | 2.571  | 0.082929598 |
| VPS4A   | 2.122 | 0.244892151 | APOM    | 6.575  | 8.45092E-05 |
| WBSCR22 | 2.551 | 0.089541415 | ZNF512B | 0.431  | 0.389442765 |
| DHX16   | 2.354 | 0.161683534 | FCF1    | 0.48   | 0.481359248 |
| STK39   | 2.542 | 0.309293484 | PSMC3IP | 5.081  | 0.012545699 |
| COL18A1 | 0.477 | 0.315088933 | TOMM5   | 0.248  | 0.003494508 |
| OAS3    | 2.025 | 0.21969437  | LCMT1   | 15.319 | 5.94824E-09 |
| RP2     | 0.437 | 0.275648039 | MRPS18A | 0.461  | 0.458729204 |
| TGOLN2  | 0.428 | 0.25700392  | FAM184B | 2.133  | 0.198637446 |
| PRKAR1A | 2.331 | 0.175142826 | ARSB    | 0.458  | 0.446067258 |
| CHAMP1  | 0.428 | 0.27255139  | DIRAS2  | 17.215 | 4.56403E-14 |
| TIMM50  | 2.636 | 0.041259461 | DLGAP4  | 2.376  | 0.425825391 |
| RHOT1   | 0.451 | 0.320087724 | IL18    | 2.553  | 0.27405099  |
| PHPT1   | 2.039 | 0.27255139  | PRMT3   | 2.9    | 0.09661627  |
| PIGK    | 0.457 | 0.309049218 | CEP290  | 3.815  | 0.002094446 |
| TMEM165 | 0.368 | 0.126747783 | POSTN   | 6.48   | 0.00018526  |

Table S3. Differentially expressed proteins in GES1 cocultured with increasing concentrations of 400 OMVs (0, 10, 20 or 40  $\mu$ g).

400 OMVs-10 $\mu$ g

| Gene Name | Sample/Control | P-Value     | Gene Name | Sample/Control | P-Value     |
|-----------|----------------|-------------|-----------|----------------|-------------|
| EEF1A2    | 1.562          | 0.000311172 | SCYL2     | 0.563          | 0.000492553 |
| KRT1      | 0.578          | 0.000636327 | TTC4      | 1.727          | 0.169141636 |
| KRT9      | 0.501          | 6.85789E-06 | MED21     | 1.809          | 0.564728592 |
| TUBB8     | 6.902          | 2.13901E-07 | KCMF1     | 0.406          | 0.230943309 |
| YBX1      | 0.663          | 0.037572566 | TPRKB     | 1.502          | 0.618898871 |
| NME2      | 1.676          | 1.94856E-05 | DPH5      | 0.659          | 0.714922579 |
| HLA-B     | 1.772          | 0.193310472 | NDUFA10   | 1.66           | 0.329918132 |
| SOD1      | 3.315          | 2.54641E-16 | ZNF598    | 2.215          | 0.139326348 |
| ACTBL2    | 1.633          | 0.065046525 | PEF1      | 0.648          | 0.307255499 |
| ARF3      | 0.617          | 0.005516719 | NOL6      | 0.208          | 0.016613547 |
| HIST2H3A  | 0.494          | 3.68627E-06 | DHX36     | 0.511          | 0.1895363   |
| RPS13     | 1.508          | 0.001068672 | H1F0      | 0.609          | 0.119321381 |
| HLA-C     | 0.659          | 0.380938552 | TCEAL4    | 0.464          | 0.305635413 |
| GSPT2     | 4.186          | 2.07461E-10 | SMARCD1   | 1.551          | 0.583853083 |
| HIST2H2AB | 1.886          | 7.50188E-08 | SKIV2L    | 1.671          | 0.424816892 |
| KRT14     | 0.47           | 0.054894375 | TGOLN2    | 0.654          | 0.57310901  |
| MARCKS    | 0.623          | 0.016652306 | RPL36A    | 0.665          | 0.379449435 |
| LRRFIP1   | 0.666          | 0.173252962 | TBL2      | 1.621          | 0.283119141 |
| POTEJ     | 1.889          | 0.429373979 | NDUFB5    | 0.651          | 0.618898871 |
| TAGLN     | 0.647          | 0.019662369 | POLR2E    | 0.499          | 0.093086696 |
| UROD      | 1.564          | 0.001532274 | GPNPAT1   | 1.623          | 0.357864592 |

|          |       |             |          |       |             |
|----------|-------|-------------|----------|-------|-------------|
| CHD5     | 1.808 | 0.493453153 | NCAPH2   | 1.783 | 0.341033252 |
| CCDC50   | 1.547 | 0.077640847 | RRAS2    | 1.56  | 0.209752089 |
| CNPY2    | 1.95  | 5.54026E-05 | ISY1     | 1.752 | 0.155647245 |
| ZCCHC8   | 1.594 | 0.046391633 | BUD31    | 1.604 | 0.449807211 |
| HIP1     | 1.52  | 0.118313952 | TPST1    | 0.618 | 0.793146806 |
| MAP2K2   | 2.014 | 0.351803764 | PVR      | 0.351 | 0.005516719 |
| BOP1     | 0.649 | 0.246425848 | TIMELESS | 0.589 | 0.618898871 |
| LAMTOR1  | 1.589 | 0.002318309 | RANBP3   | 1.645 | 0.406249682 |
| MAGOH    | 0.649 | 0.031238318 | RPL37A   | 0.613 | 0.360797199 |
| NRBP1    | 1.824 | 0.000799525 | TMUB1    | 0.419 | 0.41906193  |
| THY1     | 1.516 | 0.002247544 | TAB1     | 0.651 | 0.623505918 |
| NAA15    | 0.654 | 0.166758318 | WASL     | 0.621 | 0.006493648 |
| HIST1H1A | 1.552 | 0.161635026 | MRI1     | 1.518 | 0.640029748 |
| PPP1R14B | 3.428 | 2.54641E-16 | DUSP12   | 0.518 | 0.554849717 |
| PPIL4    | 1.559 | 0.046748744 | CHMP7    | 0.646 | 0.306171563 |
| NUP85    | 1.567 | 0.555689849 | DNAJB6   | 0.423 | 0.000975704 |
| SRSF4    | 0.493 | 0.025039104 | TMEM201  | 0.58  | 0.250276392 |
| FADD     | 1.72  | 0.011641601 | MRPS2    | 0.573 | 0.525717453 |
| PTMA     | 0.395 | 6.17524E-10 | BAK1     | 0.623 | 0.629719979 |
| PRPF4B   | 1.527 | 0.113351859 | KMT2A    | 1.656 | 0.486771178 |
| SEC22B   | 0.56  | 0.011793605 | TMEM205  | 0.659 | 0.63777029  |
| PODXL    | 0.619 | 0.018905002 | DPM3     | 0.573 | 0.231799011 |
| ERH      | 0.557 | 0.000339252 | RAB22A   | 0.64  | 0.585502448 |
| C5orf51  | 1.513 | 0.15471442  | CLCC1    | 0.352 | 0.036705253 |
| GOLPH3L  | 0.54  | 0.218007196 | CD99L2   | 3.128 | 0.000223697 |
| SRSF5    | 0.621 | 0.062415869 | VPS45    | 0.408 | 0.444677349 |
| SF3A2    | 1.702 | 0.01724673  | QTRTD1   | 0.568 | 0.426987682 |
| MED15    | 1.595 | 0.075816685 | ABCB7    | 1.716 | 0.38658669  |
| VDAC3    | 0.651 | 0.136252174 | PYCARD   | 1.547 | 0.618898871 |
| RPL38    | 1.675 | 0.000189439 | RPL29    | 0.467 | 2.59837E-07 |
| MCTS1    | 1.685 | 0.080378013 | SRFBP1   | 2.585 | 0.082404682 |
| WAPAL    | 1.828 | 0.024661821 | ZFP91    | 0.442 | 0.239738808 |
| EML4     | 0.653 | 0.02582086  | RPE      | 1.501 | 0.618898871 |
| STX5     | 0.665 | 0.379514985 | SERPINE1 | 0.633 | 0.477175674 |
| HM13     | 0.649 | 0.153257959 | KANK2    | 1.602 | 0.585502448 |
| ESD      | 1.654 | 0.300850447 | BCL2L1   | 0.512 | 0.153257959 |
| TNPO2    | 2.31  | 0.17815321  | IER3IP1  | 0.464 | 0.048108557 |
| ITPA     | 0.654 | 0.341033252 | ZNF428   | 0.623 | 0.477175674 |
| MRPL12   | 0.321 | 2.54641E-16 | STX16    | 0.566 | 0.629423589 |
| BSDC1    | 1.503 | 0.419462333 | SLC25A11 | 0.637 | 0.646211486 |
| M6PR     | 0.63  | 0.027030261 | RPL39    | 1.926 | 0.000174971 |
| ADAM9    | 0.527 | 0.055777578 | PTCD1    | 1.746 | 0.537198013 |
| RAD23A   | 1.675 | 0.053449019 | MBOAT7   | 0.609 | 0.486771178 |
| EXOSC3   | 1.889 | 0.002010316 | MYADM    | 0.517 | 0.467923184 |

|           |       |             |           |       |             |
|-----------|-------|-------------|-----------|-------|-------------|
| SAMM50    | 0.593 | 0.107603752 | PMVK      | 0.593 | 0.671824173 |
| DIMT1     | 0.634 | 0.110199592 | SLC9A3R2  | 0.546 | 0.638635743 |
| BICD2     | 0.376 | 0.012663096 | LEPREL4   | 0.61  | 0.406569556 |
| HADH      | 1.552 | 0.076186131 | NPC2      | 1.582 | 0.467729461 |
| FAM105B   | 0.592 | 0.373356781 | HIRIP3    | 1.576 | 0.537885573 |
| PPP4C     | 1.942 | 0.201439327 | TMEM41B   | 0.408 | 0.274336816 |
| PFDN5     | 1.667 | 0.004491309 | CRELD1    | 0.612 | 0.618898871 |
| DYNLL2    | 0.593 | 0.31842287  | BOD1      | 0.665 | 0.671824173 |
| PCMT1     | 2.309 | 0.005904476 | ABRACL    | 2.287 | 0.109379066 |
| C14orf142 | 3.485 | 7.64642E-09 | NIPSNAP3A | 0.604 | 0.618898871 |
| ALB       | 0.329 | 2.54641E-16 | DYNLRB1   | 1.596 | 0.532193622 |
| NOL10     | 0.642 | 0.438930127 | ATP6V1G1  | 0.432 | 0.002010316 |
| YKT6      | 1.728 | 0.019044827 | PCYT1A    | 0.637 | 0.806443661 |
| RPL18A    | 0.622 | 0.010012661 | SDC2      | 0.63  | 0.704399451 |
| HNRNPA0   | 2.149 | 0.002010316 | DYNLT3    | 1.753 | 0.478000276 |
| CETN2     | 2.245 | 0.007798352 | CRLF3     | 0.424 | 0.18656695  |
| HMGNI     | 0.357 | 5.342E-05   | MASTL     | 1.687 | 0.493453153 |
| CWC15     | 0.6   | 0.005644114 | ADRM1     | 0.415 | 0.013050282 |
| RPA3      | 1.824 | 0.052487053 | TMUB2     | 1.766 | 0.531113858 |
| S100A16   | 0.571 | 0.052569295 | RAB30     | 0.612 | 0.790881601 |
| DNPEP     | 1.619 | 0.161427126 | AIF1L     | 0.606 | 0.446714291 |
| FTH1      | 1.621 | 0.079023057 | NUP37     | 1.662 | 0.618898871 |
| PACSIN3   | 0.628 | 0.314987107 | CCDC43    | 1.538 | 0.24577636  |
| POLE3     | 1.53  | 0.089552253 | COQ5      | 0.477 | 0.156371637 |
| UBA5      | 1.562 | 0.251067369 | ARL1      | 0.335 | 0.023138278 |
| NPM3      | 1.943 | 0.013617572 | DDX51     | 0.595 | 0.686055952 |
| ILVBL     | 1.569 | 0.407148287 | ULBP2     | 0.664 | 0.57310901  |
| ARL6IP5   | 0.637 | 0.201667265 | NARS2     | 0.598 | 0.618898871 |
| DCBLD2    | 1.56  | 0.330709157 | YIF1B     | 0.561 | 0.534452043 |
| GATAD2B   | 0.489 | 0.128516841 | ABHD12    | 0.592 | 0.037572566 |
| PLEKHO2   | 1.763 | 0.130640584 | WDR70     | 1.605 | 0.631787363 |
| SNRPD2    | 0.656 | 0.274336816 | APOE      | 2.389 | 0.008105754 |
| ABII      | 1.844 | 0.068084686 | UBE2J2    | 0.59  | 0.618898871 |
| RPL28     | 0.518 | 0.002661871 | EED       | 0.651 | 0.753850551 |
| THUMPD1   | 1.584 | 0.285825746 | SRC       | 0.541 | 0.618898871 |
| SUCLA2    | 1.557 | 0.158801385 | SLC1A3    | 1.525 | 0.652133914 |
| SUN2      | 2.635 | 0.125289877 | ARL2BP    | 0.619 | 0.435127345 |
| AHSG      | 0.26  | 5.59237E-15 | GDA       | 0.548 | 0.489294161 |
| FAF1      | 0.521 | 0.424508351 | SLC43A3   | 0.564 | 0.618898871 |
| NUDT21    | 0.634 | 0.475029293 | TSPAN6    | 1.559 | 0.618898871 |
| ARL8B     | 2.171 | 0.011613021 | EMC10     | 0.609 | 0.403965462 |
| KLC4      | 0.493 | 0.213582226 | MRPL21    | 1.899 | 0.250646827 |
| SLC7A5    | 0.637 | 0.049891437 | MECR      | 2.191 | 0.077796733 |
| HTRA2     | 1.691 | 0.211857039 | C9orf114  | 0.61  | 0.618898871 |

|          |       |             |          |       |             |
|----------|-------|-------------|----------|-------|-------------|
| LRSAM1   | 1.883 | 0.437331933 | SLC29A1  | 0.256 | 0.010541231 |
| BANF1    | 1.61  | 0.000568194 | BUD13    | 0.536 | 0.606696036 |
| BAG5     | 1.916 | 0.155647245 | NSA2     | 0.619 | 0.742832468 |
| RDH11    | 0.515 | 0.12859221  | OS9      | 2.419 | 0.000799979 |
| MOB4     | 2.155 | 0.042142815 | TAF9     | 0.647 | 0.786449089 |
| SDC1     | 1.924 | 0.018905002 | INPP1    | 2.048 | 0.09079003  |
| BCAT1    | 2.657 | 1.34387E-05 | TMEM33   | 0.496 | 0.094650747 |
| SEC62    | 0.638 | 0.134256917 | GEMIN4   | 1.506 | 0.424508351 |
| IPO8     | 3.91  | 0.000598254 | SLC35A4  | 0.362 | 0.003966463 |
| FAM98A   | 1.519 | 0.246425848 | SMEK1    | 0.641 | 0.681892997 |
| EEF1E1   | 1.559 | 0.01531842  | CD63     | 0.303 | 3.56087E-05 |
| CLTA     | 0.652 | 0.049891437 | MRPL22   | 2.887 | 0.000339252 |
| COMMD3   | 1.732 | 0.157382786 | CDC42BPB | 0.582 | 0.345307996 |
| GAR1     | 1.975 | 0.013776067 | CKMT1B   | 0.652 | 0.772493107 |
| TNS3     | 1.898 | 0.313007579 | C6orf120 | 0.542 | 0.52443408  |
| PZP      | 0.637 | 0.251452727 | MTCH1    | 0.659 | 0.71389725  |
| CLPB     | 2.161 | 0.123321293 | POLR2F   | 0.236 | 4.11092E-06 |
| SLC16A1  | 0.608 | 0.394152658 | KLHL12   | 0.578 | 0.57310901  |
| SHCBP1   | 2.612 | 0.129017665 | URB2     | 0.448 | 0.269730423 |
| LACTB2   | 0.529 | 0.054626941 | PEBP1    | 0.567 | 0.618898871 |
| EFTUD1   | 0.619 | 0.534119082 | KAT7     | 0.471 | 0.045370533 |
| ASAH1    | 1.596 | 0.358277358 | LAMP1    | 0.453 | 0.017958226 |
| UBR7     | 1.619 | 0.424508351 | MAGT1    | 0.523 | 0.354904406 |
| GPN3     | 0.136 | 2.40001E-05 | SERINC1  | 0.478 | 0.588254933 |
| PPP3CA   | 1.97  | 0.076679985 | GMPPA    | 0.542 | 0.618898871 |
| BUB1B    | 1.807 | 0.518817819 | ZNF143   | 0.606 | 0.710752914 |
| EXOSC5   | 1.764 | 0.193150249 | PTMS     | 2.015 | 0.033073041 |
| VAMP8    | 0.536 | 0.04443115  | TOMM5    | 0.481 | 0.008889516 |
| MECP2    | 0.579 | 0.253254139 | LRP1     | 0.617 | 0.668955236 |
| PFN2     | 2.34  | 0.003060742 | GGA2     | 0.443 | 0.001205014 |
| DDX10    | 0.585 | 0.489989698 | UQCC     | 0.403 | 0.364125729 |
| TMCO1    | 1.629 | 0.045370533 | FAM175B  | 0.578 | 0.659124539 |
| APP      | 1.553 | 0.358277358 | SDHB     | 0.655 | 0.629668503 |
| DOHH     | 1.51  | 0.511096355 | NDUFA4   | 0.607 | 0.171002296 |
| RAB5B    | 0.639 | 0.801684165 | C2orf18  | 0.563 | 0.488692984 |
| RRP9     | 0.478 | 0.36415372  | UBAC2    | 1.511 | 0.040222111 |
| MUT      | 1.693 | 0.448279613 | MIF      | 0.389 | 0.000256069 |
| WIBG     | 0.476 | 0.053335333 | FAM96A   | 0.653 | 0.618898871 |
| SLC25A22 | 0.641 | 0.450369059 | C16orf80 | 1.576 | 0.552924028 |
| COMMD1   | 4.979 | 1.55194E-08 | CHD1L    | 0.516 | 0.622552039 |
| AGRN     | 3.518 | 0.003438903 | JTB      | 0.419 | 0.362527373 |
| PPP6R1   | 2.399 | 0.01563635  | TMEM258  | 0.654 | 0.273162185 |
| CD109    | 2.108 | 0.250276392 |          |       |             |



400 OMVs-20µg

| Gene Name | Sample/Control | P-Value     | Gene Name | Sample/Control | P-Value     |
|-----------|----------------|-------------|-----------|----------------|-------------|
| TUBB2A    | 0.557          | 0.034041822 | WIBG      | 0.477          | 0.009657884 |
| EEF1A2    | 1.643          | 0.003858858 | DRG2      | 1.519          | 0.662818211 |
| TPM4      | 0.646          | 0.022574886 | ARL3      | 0.566          | 0.123905921 |
| TUBB8     | 2.848          | 0.100172345 | TRIO      | 0.577          | 0.246790849 |
| TPM3      | 0.656          | 0.031450361 | PPP6C     | 1.745          | 0.480090682 |
| SFN       | 0.658          | 0.043050899 | COMMD1    | 3.67           | 0.000229955 |
| HNRNPA1   | 0.64           | 0.018238741 | PPP6R1    | 2.1            | 0.152625235 |
| BASP1     | 0.609          | 0.005211072 | GCLM      | 1.528          | 0.761010187 |
| EIF4B     | 0.529          | 0.000185259 | CD109     | 2.043          | 0.320348907 |
| HMGB2     | 0.618          | 0.011994023 | SF3B4     | 0.637          | 0.329399799 |
| HIST2H3A  | 0.442          | 2.85747E-07 | AUP1      | 2.364          | 0.025301757 |
| HNRNPA3   | 0.652          | 0.038706671 | GATAD2A   | 0.637          | 0.403415343 |
| RPS13     | 1.501          | 0.034278419 | MED21     | 1.709          | 0.583856778 |
| RBMX      | 0.576          | 0.00113803  | TXNDC12   | 0.598          | 0.155599797 |
| GSPT2     | 1.987          | 0.206819926 | KCMF1     | 0.316          | 0.000852434 |
| HIST1H2AB | 0.486          | 3.21859E-06 | DPH5      | 0.443          | 0.025031461 |
| MARCKS    | 0.622          | 0.015607161 | ZNF598    | 2.441          | 0.053337478 |
| LUC7L2    | 0.641          | 0.027494783 | RBM34     | 1.822          | 0.227110512 |
| LRRFIP1   | 0.659          | 0.057162889 | SUMF2     | 1.649          | 0.611249554 |
| THBS1     | 1.699          | 0.033871054 | TOR1A     | 0.626          | 0.376620053 |
| CHD5      | 2.079          | 0.289364939 | PSMB8     | 1.828          | 0.403391313 |
| PEA15     | 0.468          | 1.56015E-06 | H1FO      | 0.642          | 0.142351105 |
| UGP2      | 1.516          | 0.269983308 | ACTR10    | 0.563          | 0.381777107 |
| MAP2K2    | 1.702          | 0.554013301 | TCEAL4    | 0.443          | 0.02334427  |
| EMC1      | 1.582          | 0.223963727 | KLHL7     | 1.564          | 0.677187261 |
| H3F3A     | 0.383          | 2.34617E-10 | POLA1     | 1.648          | 0.743770342 |
| NRBP1     | 1.675          | 0.108211435 | VTN       | 1.664          | 0.008544464 |
| CD9       | 1.503          | 0.060084345 | BAZ1A     | 0.652          | 0.448780889 |
| DNAJA2    | 0.566          | 0.001916341 | TGOLN2    | 0.471          | 0.010384799 |
| PPP1R14B  | 1.559          | 0.236046517 | COL5A1    | 1.87           | 0.325028819 |
| HNRNPAB   | 0.56           | 0.002328815 | PC        | 1.563          | 0.669729076 |
| NUP85     | 1.706          | 0.493348367 | POLR2E    | 0.234          | 2.36141E-09 |
| SRSF4     | 0.416          | 0.000347774 | GNPNAT1   | 1.594          | 0.527821654 |
| FADD      | 1.576          | 0.23669937  | NDUFB11   | 0.641          | 0.264231677 |
| PTMA      | 0.479          | 6.50808E-06 | CTSB      | 0.546          | 0.134702874 |
| LASP1     | 0.645          | 0.137521692 | YIPF3     | 1.843          | 0.487175269 |
| MMS19     | 1.527          | 0.394730663 | TCEAL3    | 0.545          | 0.181931028 |
| DDX50     | 2.259          | 0.006033072 | PVR       | 0.478          | 0.032906915 |
| UQCRH     | 0.639          | 0.125321628 | TIMELESS  | 0.64           | 0.423002686 |
| NQO1      | 1.575          | 0.070831401 | TIMM17B   | 1.561          | 0.726569919 |
| SPAG5     | 0.585          | 0.251924105 | TMUB1     | 0.361          | 0.04662248  |

|           |       |             |          |       |             |
|-----------|-------|-------------|----------|-------|-------------|
| LYAR      | 0.603 | 0.06370887  | UACA     | 1.625 | 0.762405428 |
| SRSF3     | 0.634 | 0.024067787 | DNAJB6   | 0.461 | 0.000380983 |
| ERH       | 0.595 | 0.003933032 | ATP5J2   | 1.676 | 0.145058317 |
| GNG12     | 0.628 | 0.02334427  | NUDT19   | 1.562 | 0.725855098 |
| CHMP4B    | 0.666 | 0.052125375 | KMT2A    | 1.628 | 0.653603252 |
| WAPAL     | 1.75  | 0.206819926 | DPM3     | 0.466 | 0.001601833 |
| UQCRFS1   | 1.666 | 0.11769331  | CLCC1    | 0.525 | 0.090118349 |
| OSBP      | 1.536 | 0.403415343 | JUND     | 0.661 | 0.460029686 |
| AP1G1     | 1.652 | 0.107888895 | SLTM     | 0.551 | 0.164897122 |
| ADAM9     | 0.489 | 0.003933032 | ITIH2    | 3.333 | 0.022882962 |
| PWP2      | 1.535 | 0.476507121 | ABCB7    | 0.656 | 0.480090682 |
| BICD2     | 0.301 | 3.75542E-05 | GGCT     | 1.579 | 0.260232164 |
| PCMT1     | 1.769 | 0.289364939 | NIPBL    | 1.808 | 0.606558597 |
| PDS5B     | 1.509 | 0.743770342 | PYCARD   | 1.532 | 0.77162189  |
| C14orf142 | 1.862 | 0.052446781 | RPL29    | 0.46  | 1.41553E-06 |
| ALB       | 0.453 | 1.87731E-07 | KANK2    | 1.662 | 0.583832813 |
| BAX       | 0.631 | 0.112832383 | BCL2L1   | 0.215 | 2.51611E-07 |
| DAP3      | 1.5   | 0.324101555 | STX16    | 0.6   | 0.433160096 |
| DHX29     | 2.117 | 0.085944329 | THUMPD3  | 1.523 | 0.752421153 |
| HNRNPA0   | 2.479 | 5.62407E-05 | NEDD4    | 1.506 | 0.774109753 |
| HMGNI     | 0.384 | 2.38644E-06 | ITGB3    | 1.673 | 0.608091478 |
| AAAS      | 1.54  | 0.277913523 | PTCD1    | 2.253 | 0.266658817 |
| S100A10   | 0.581 | 0.002400308 | NUDT1    | 0.633 | 0.387899534 |
| S100A16   | 0.428 | 8.36557E-05 | HMGNI    | 0.466 | 0.130554372 |
| BCL2L13   | 1.571 | 0.257133064 | PMVK     | 0.572 | 0.381580495 |
| ABCD3     | 1.632 | 0.38253354  | SLC9A3R2 | 2.897 | 0.003046327 |
| S100A11   | 0.512 | 2.82431E-05 | MED8     | 1.852 | 0.418963128 |
| PLRG1     | 1.674 | 0.129418155 | TMEM41B  | 0.434 | 0.097400602 |
| TEX10     | 2.196 | 0.022362824 | PCNP     | 0.443 | 0.02334427  |
| ILVBL     | 1.553 | 0.565432072 | ATP6V1G1 | 0.445 | 0.000637937 |
| PAPSS1    | 2.256 | 0.109651918 | PCYT1A   | 0.531 | 0.402598044 |
| CLPTM1L   | 1.52  | 0.323681737 | TMUB2    | 1.709 | 0.583158957 |
| DCBLD2    | 1.541 | 0.495876835 | PIGK     | 0.507 | 0.106255278 |
| ABI1      | 1.583 | 0.45098073  | COASY    | 1.896 | 0.351996159 |
| MPRIIP    | 0.595 | 0.189963953 | TMBIM6   | 1.573 | 0.662005315 |
| RPL28     | 0.631 | 0.023073052 | LSM14A   | 0.641 | 0.456693497 |
| DHX16     | 1.619 | 0.580858261 | ARL1     | 0.386 | 0.004406429 |
| CDC73     | 1.632 | 0.254490527 | APOE     | 2.867 | 5.58922E-05 |
| AHSG      | 0.286 | 2.90759E-16 | GALNS    | 1.57  | 0.596956176 |
| FAF1      | 0.419 | 0.073313709 | DDX41    | 3.188 | 0.001872665 |
| RPS27     | 0.628 | 0.098631006 | APOOL    | 1.681 | 0.669729076 |
| TIAL1     | 1.647 | 0.235628101 | CASK     | 1.506 | 0.774109753 |
| CD99      | 0.511 | 0.069265774 | SRC      | 0.556 | 0.235059744 |
| CDK2      | 1.662 | 0.120786128 | TGFBI    | 2.125 | 0.112832383 |

|          |       |             |          |       |             |
|----------|-------|-------------|----------|-------|-------------|
| BAG5     | 1.509 | 0.732857824 | SLC1A3   | 1.606 | 0.647677947 |
| GPR89A   | 1.866 | 0.295678766 | NHEJ1    | 1.592 | 0.663836027 |
| RAB3B    | 1.601 | 0.633893218 | SLC29A1  | 0.421 | 0.016138286 |
| PARD3    | 0.314 | 3.69347E-05 | BUD13    | 0.549 | 0.223487669 |
| IPO8     | 2.992 | 0.008600814 | INPP1    | 1.624 | 0.610161431 |
| LTV1     | 1.575 | 0.403415343 | KATNB1   | 1.801 | 0.422363429 |
| FAM98A   | 1.567 | 0.30939873  | DHX37    | 0.443 | 0.144967552 |
| POLD1    | 1.717 | 0.480090682 | CCS      | 0.633 | 0.387899534 |
| IAH1     | 0.577 | 0.160286155 | GNG5     | 0.329 | 5.06281E-07 |
| CLTA     | 0.616 | 0.007073144 | CD63     | 0.4   | 0.002399275 |
| COMMD3   | 1.798 | 0.243455521 | MRPL22   | 3.255 | 6.94641E-05 |
| CNBP     | 0.607 | 0.233538359 | CDC42BPB | 0.56  | 0.14670288  |
| XRCC4    | 0.625 | 0.205235335 | GBE1     | 1.635 | 0.619710599 |
| TNS3     | 2.112 | 0.183661555 | CKMT1B   | 1.604 | 0.655504711 |
| SULT1A1  | 1.518 | 0.398628208 | KIF14    | 1.67  | 0.677063884 |
| CLPB     | 2.105 | 0.180485709 | POLR2F   | 0.24  | 1.77594E-08 |
| KIAA0196 | 1.906 | 0.25947987  | URB2     | 0.54  | 0.146386934 |
| LACTB2   | 0.661 | 0.205235335 | PEBP1    | 0.64  | 0.455427107 |
| NOP9     | 2.415 | 0.031728494 | PPP1R9B  | 0.429 | 0.204271633 |
| TRMT112  | 0.604 | 0.110341594 | LAMP1    | 0.537 | 0.015339053 |
| GPN3     | 0.127 | 9.19333E-12 | MAGT1    | 1.515 | 0.657037399 |
| PPP3CA   | 1.638 | 0.583553081 | SERINC1  | 0.312 | 0.022882962 |
| BUB1B    | 2.049 | 0.407895182 | CHMP3    | 0.603 | 0.246790849 |
| DCTN4    | 0.551 | 0.207363732 | PIP4K2B  | 0.666 | 0.403415343 |
| MAPK14   | 1.515 | 0.526232581 | PTMS     | 2.174 | 0.012211269 |
| C3       | 1.621 | 0.178212219 | TOMM5    | 0.531 | 0.007467634 |
| VAMP8    | 0.521 | 0.007423349 | LRP1     | 0.421 | 0.030669459 |
| MTPAP    | 1.693 | 0.501460321 | VBP1     | 0.532 | 0.041462974 |
| MECP2    | 0.593 | 0.128059342 | NUCKS1   | 0.392 | 0.008776125 |
| UCHL3    | 0.617 | 0.204134013 | C2orf18  | 0.448 | 0.025756074 |
| PFN2     | 1.895 | 0.068392876 | UBAC2    | 1.689 | 0.077617509 |
| CCDC12   | 0.62  | 0.261047716 | FGG      | 1.571 | 0.77053853  |
| ATP5D    | 0.488 | 0.001537889 | RRP9     | 0.555 | 0.180485709 |

400 OMVs-40µg

| Gene Name | Sample/Control | P-Value     | Gene Name | Sample/Control | P-Value     |
|-----------|----------------|-------------|-----------|----------------|-------------|
| TUBB2A    | 0.596          | 0.358351682 | CLTA      | 0.584          | 0.192355917 |
| EEF1A2    | 1.785          | 0.020554008 | CNBP      | 0.496          | 0.192354132 |
| STIP1     | 0.644          | 0.271678019 | TNS3      | 2.115          | 0.406714997 |
| SSB       | 0.653          | 0.311284758 | INTS3     | 0.536          | 0.27430186  |
| KRT1      | 2.546          | 6.74968E-06 | KIAA0196  | 1.721          | 0.712050529 |
| UCHL1     | 0.658          | 0.333709471 | SGPL1     | 1.502          | 0.660825896 |

|           |        |             |          |       |             |
|-----------|--------|-------------|----------|-------|-------------|
| TCOF1     | 0.666  | 0.370054448 | SEC11A   | 1.955 | 0.092928196 |
| SERBP1    | 0.621  | 0.193017701 | MARCKSL1 | 0.461 | 0.027355446 |
| KRT9      | 2.488  | 1.26395E-05 | CASP4    | 0.626 | 0.504882117 |
| TPM4      | 0.561  | 0.053542544 | NOP9     | 2.765 | 0.048794037 |
| TUBB8     | 2.085  | 0.515013123 | TRMT112  | 0.568 | 0.266070011 |
| YBX1      | 0.638  | 0.251571069 | FNTA     | 0.479 | 0.108201953 |
| TPM2      | 0.551  | 0.041095031 | EMG1     | 1.503 | 0.564403023 |
| OGDH      | 1.652  | 0.072148895 | GPN3     | 0.183 | 1.91909E-05 |
| SFN       | 0.639  | 0.251571069 | BROX     | 1.647 | 0.477267555 |
| ENAH      | 0.636  | 0.389482386 | PPP3CA   | 1.861 | 0.564403023 |
| DNAJA1    | 0.657  | 0.477267555 | BUB1B    | 1.544 | 0.849490773 |
| CNN3      | 0.593  | 0.111853102 | EXOSC5   | 1.581 | 0.813109973 |
| BASP1     | 0.583  | 0.089818216 | NEXN     | 0.631 | 0.543027022 |
| AP2A1     | 1.507  | 0.343369721 | C3       | 1.941 | 0.108201953 |
| EIF4B     | 0.488  | 0.019413136 | VAMP8    | 0.521 | 0.089671872 |
| TXNDC5    | 0.655  | 0.319356177 | MTPAP    | 1.804 | 0.599172847 |
| HMGB2     | 0.597  | 0.201804315 | CHCHD2P9 | 0.611 | 0.462633143 |
| RAD23B    | 0.591  | 0.106185166 | SMTN     | 0.584 | 0.668674441 |
| HIST2H3A  | 0.28   | 3.71021E-07 | CCDC12   | 0.645 | 0.571779314 |
| CYB5R3    | 1.559  | 0.251571069 | C16orf88 | 0.628 | 0.788075393 |
| FSTL1     | 0.458  | 0.006938167 | ATP5D    | 0.56  | 0.19899203  |
| SLC25A13  | 1.557  | 0.242124987 | CSTF3    | 1.608 | 0.792232654 |
| BAG3      | 0.572  | 0.161364937 | RRP9     | 0.592 | 0.495919056 |
| TAGLN2    | 0.642  | 0.263773061 | SOAT1    | 2.057 | 0.398785959 |
| KRT16     | 11.024 | 2.58146E-16 | S100A6   | 0.612 | 0.16546406  |
| RPS5      | 0.602  | 0.134081914 | WIBG     | 0.414 | 0.020860587 |
| RBMX      | 0.653  | 0.311613293 | MYO6     | 1.607 | 0.820646153 |
| GSPT2     | 3.047  | 0.009627383 | APLP2    | 0.501 | 0.189680246 |
| HIST2H2AB | 1.635  | 0.079717284 | TRIO     | 0.596 | 0.569704879 |
| KRT14     | 4.155  | 3.91438E-08 | PTX3     | 1.541 | 0.763520909 |
| PFKM      | 1.526  | 0.361719426 | ADPRHL2  | 0.616 | 0.415544887 |
| MOGS      | 1.544  | 0.271965037 | PPP6C    | 1.627 | 0.797456997 |
| HIST1H2AB | 0.629  | 0.218071475 | COMMD1   | 2.758 | 0.078801458 |
| LUC7L2    | 0.54   | 0.097093495 | PPP6R1   | 2.345 | 0.207176641 |
| NNT       | 1.549  | 0.287056758 | GINS2    | 0.634 | 0.48680766  |
| FLII      | 1.515  | 0.499907591 | GCLM     | 1.594 | 0.82271381  |
| KHSRP     | 0.644  | 0.424632247 | CD109    | 2.207 | 0.398785959 |
| POTEJ     | 2.139  | 0.4083241   | SF3B4    | 0.594 | 0.430683148 |
| KRT5      | 2.491  | 0.002357078 | RDH14    | 1.503 | 0.852477227 |
| SF1       | 0.579  | 0.213644086 | GTF3C1   | 1.753 | 0.678525098 |
| DBNL      | 0.606  | 0.253565012 | THOC2    | 1.517 | 0.719962108 |
| TAGLN     | 0.551  | 0.041095031 | AUP1     | 2.148 | 0.329435668 |
| CDV3      | 0.599  | 0.251571069 | SCYL2    | 0.56  | 0.078144986 |
| GPD2      | 1.623  | 0.260898247 | TTC4     | 1.702 | 0.562284496 |

|          |       |             |          |       |             |
|----------|-------|-------------|----------|-------|-------------|
| PMPCA    | 1.641 | 0.398785959 | TXNDC12  | 0.556 | 0.287309067 |
| PRPF3    | 1.516 | 0.424632247 | KCMF1    | 0.245 | 0.001110959 |
| THBS1    | 1.511 | 0.514701222 | DHRS7    | 1.711 | 0.564403023 |
| CHD5     | 2.189 | 0.43716747  | DPH5     | 0.663 | 0.717246572 |
| PDHA1    | 1.59  | 0.4083241   | DHCR7    | 1.729 | 0.504658149 |
| PEA15    | 0.482 | 0.01947075  | PPP1R2   | 0.53  | 0.263773061 |
| SLC9A3R1 | 0.641 | 0.398785959 | LRPAP1   | 0.608 | 0.463682717 |
| RRP12    | 1.839 | 0.084684275 | ZNF598   | 2.369 | 0.243217701 |
| JUP      | 1.74  | 0.360200872 | RBM34    | 1.735 | 0.553939275 |
| UGP2     | 1.832 | 0.126406992 | PSMD9    | 0.578 | 0.398785959 |
| ACOT9    | 1.583 | 0.251571069 | POLR3C   | 1.588 | 0.737600683 |
| COPG2    | 1.655 | 0.398785959 | RAB31    | 1.939 | 0.494198007 |
| SH3GL1   | 0.634 | 0.406714997 | TCEAL4   | 0.423 | 0.121699468 |
| KLC2     | 0.513 | 0.055153414 | SMARCD1  | 1.533 | 0.849490773 |
| LUC7L3   | 0.57  | 0.162296587 | TMTC3    | 1.759 | 0.646375762 |
| SMCHD1   | 1.51  | 0.505895479 | SCAMP2   | 0.638 | 0.481453034 |
| UBE2N    | 0.662 | 0.350481005 | TAF10    | 0.637 | 0.763503024 |
| ATXN2L   | 0.595 | 0.282826118 | KLHL7    | 1.544 | 0.84009918  |
| FKBP3    | 0.587 | 0.23943503  | BRK1     | 0.644 | 0.413559318 |
| TCEA1    | 0.64  | 0.424632247 | POLA1    | 2.125 | 0.495013285 |
| EMC1     | 1.562 | 0.504658149 | VTN      | 2.188 | 0.004982693 |
| HSDL2    | 1.645 | 0.197448512 | TGOLN2   | 0.507 | 0.191600718 |
| H3F3A    | 0.445 | 0.009919407 | LIMCH1   | 0.664 | 0.71819139  |
| SPARC    | 0.414 | 0.004762642 | SPC25    | 0.605 | 0.564403023 |
| DNAJA2   | 0.594 | 0.225841652 | RPL36A   | 0.582 | 0.230408053 |
| PDCD11   | 1.531 | 0.370352145 | SSBP1    | 1.794 | 0.383402576 |
| STRBP    | 1.502 | 0.852477227 | POLR2E   | 0.21  | 1.66875E-06 |
| HIST1H1A | 1.517 | 0.564403023 | ARL6IP1  | 0.518 | 0.093560954 |
| SDF4     | 0.618 | 0.342036291 | CENPV    | 1.562 | 0.84009918  |
| NOC3L    | 1.549 | 0.406286357 | MRPS9    | 1.744 | 0.571779314 |
| UBE2S    | 0.523 | 0.063319444 | ISY1     | 0.617 | 0.505895479 |
| ECHS1    | 1.636 | 0.395990113 | YIPF3    | 1.736 | 0.728256645 |
| NUP85    | 1.835 | 0.574160482 | TCEAL3   | 0.442 | 0.252275262 |
| SRSF4    | 0.549 | 0.206968725 | DPM1     | 1.519 | 0.785686182 |
| LUC7L    | 0.629 | 0.362228431 | PVR      | 0.371 | 0.009043529 |
| XRN2     | 1.679 | 0.266070011 | METTL1   | 1.75  | 0.724896883 |
| UBE2C    | 0.34  | 0.000191128 | TIMELESS | 0.598 | 0.564403023 |
| PAFAH1B2 | 0.602 | 0.253795885 | CCDC137  | 1.63  | 0.564403023 |
| EIF1AX   | 0.645 | 0.426290746 | ATP5J2   | 1.842 | 0.169989147 |
| HEATR1   | 1.616 | 0.356478014 | SLC44A2  | 0.638 | 0.518036626 |
| DNAJC13  | 2.043 | 0.172912635 | SLC38A2  | 2.804 | 0.055153414 |
| PTMA     | 0.392 | 0.000293945 | NUDT19   | 1.597 | 0.824787575 |
| TFAM     | 0.654 | 0.48680766  | KMT2A    | 1.645 | 0.791896459 |
| LASP1    | 0.57  | 0.191600718 | TMEM205  | 0.497 | 0.191857645 |

|           |       |             |          |       |             |
|-----------|-------|-------------|----------|-------|-------------|
| RPS6KA3   | 1.535 | 0.543027022 | TACO1    | 0.555 | 0.311613293 |
| DDX50     | 2.081 | 0.103281543 | DPM3     | 0.463 | 0.046734891 |
| CTR9      | 1.511 | 0.479177753 | CLCC1    | 0.595 | 0.430683148 |
| SLC25A10  | 1.569 | 0.463682717 | SLTM     | 0.54  | 0.398785959 |
| SLC25A12  | 1.572 | 0.711386206 | NUP43    | 0.657 | 0.582773169 |
| RBM8A     | 0.609 | 0.251571069 | ITIH2    | 3.596 | 0.013310112 |
| ZC3H18    | 0.567 | 0.179178921 | ABCB7    | 0.399 | 0.0854973   |
| HMGCS1    | 0.624 | 0.398785959 | HBE1     | 0.61  | 0.424632247 |
| TBCA      | 0.522 | 0.082744578 | NIPBL    | 1.889 | 0.61006595  |
| TIMM44    | 1.52  | 0.398785959 | RPL29    | 0.431 | 0.002949829 |
| LYAR      | 0.561 | 0.173842184 | PRKRIP1  | 0.655 | 0.613355363 |
| LPP       | 0.656 | 0.556868369 | SRFBP1   | 1.904 | 0.626144354 |
| SRSF3     | 0.625 | 0.311519348 | PCM1     | 0.46  | 0.219838019 |
| ERH       | 0.571 | 0.147432669 | ZFP91    | 0.511 | 0.27316954  |
| C5orf51   | 1.68  | 0.424632247 | KANK2    | 1.542 | 0.852477227 |
| PTPLAD1   | 1.629 | 0.252189649 | BRCC3    | 1.516 | 0.852477227 |
| PDAP1     | 0.563 | 0.120033939 | ZNF428   | 0.618 | 0.477267555 |
| SRSF5     | 0.574 | 0.227107617 | PLG      | 1.703 | 0.717246572 |
| HMGB3     | 0.655 | 0.463682717 | NEDD4    | 1.811 | 0.614996536 |
| GID8      | 0.476 | 0.111853102 | ITGB3    | 2.074 | 0.452720487 |
| CHMP4B    | 0.622 | 0.336477121 | PTCD1    | 2.926 | 0.125538571 |
| WAPAL     | 1.562 | 0.571779314 | NUDT1    | 0.569 | 0.499907591 |
| LBR       | 1.667 | 0.191600718 | HMGN3    | 0.422 | 0.203401945 |
| GPATCH4   | 0.66  | 0.497569361 | MYADM    | 0.651 | 0.684042092 |
| OSBP      | 1.536 | 0.718961291 | SLC9A3R2 | 2.831 | 0.081726524 |
| AP1G1     | 1.646 | 0.395990113 | TMEM41B  | 0.435 | 0.251571069 |
| OPTN      | 0.644 | 0.493575587 | PCNP     | 0.441 | 0.126406992 |
| RAD23A    | 1.601 | 0.543027022 | ABRACL   | 1.565 | 0.84009918  |
| ZRANB2    | 0.608 | 0.274995807 | TMA16    | 0.586 | 0.512700917 |
| RPS23     | 0.653 | 0.420392845 | ATP6V1G1 | 0.502 | 0.103254248 |
| PWP2      | 1.882 | 0.23265471  | SCYL1    | 0.596 | 0.361719426 |
| BICD2     | 0.504 | 0.179178921 | ADRM1    | 0.508 | 0.134200906 |
| HADH      | 1.566 | 0.494287147 | TMUB2    | 1.97  | 0.54783545  |
| CHCHD3    | 0.571 | 0.200560193 | ASF1A    | 0.501 | 0.380675952 |
| CRYZ      | 1.747 | 0.282675045 | COASY    | 2.153 | 0.380685397 |
| LRWD1     | 1.529 | 0.61006595  | SLC5A6   | 1.644 | 0.765583134 |
| PDS5B     | 1.549 | 0.84009918  | COQ5     | 0.601 | 0.452611466 |
| RPS20     | 0.585 | 0.191857645 | TMBIM6   | 1.614 | 0.80448368  |
| C14orf142 | 2.52  | 0.012076128 | WDR44    | 1.632 | 0.624771856 |
| ALB       | 0.39  | 2.64542E-05 | SRGAP2   | 1.512 | 0.852477227 |
| SMU1      | 1.513 | 0.568682884 | ARL1     | 0.574 | 0.424632247 |
| DHX29     | 2.122 | 0.338693262 | RHOT1    | 1.541 | 0.843623064 |
| HNRNPA0   | 2.346 | 0.025263881 | APOE     | 5.108 | 4.0446E-08  |
| NDUFA5    | 0.62  | 0.494024003 | SSNA1    | 0.561 | 0.589356343 |

|         |       |             |         |       |             |
|---------|-------|-------------|---------|-------|-------------|
| HMGNI   | 0.406 | 0.004506887 | APOOL   | 2.034 | 0.515013123 |
| SGTA    | 0.5   | 0.061424294 | CHMP1A  | 0.583 | 0.333407643 |
| AAAS    | 1.849 | 0.162296587 | CEPT1   | 2.086 | 0.090294602 |
| UCK2    | 0.601 | 0.286278069 | CASK    | 1.764 | 0.719962108 |
| S100A16 | 0.38  | 0.001860782 | SRC     | 0.654 | 0.76472748  |
| SEC23B  | 1.662 | 0.398785959 | SLC1A3  | 1.776 | 0.685283171 |
| ABCD3   | 1.873 | 0.390114314 | ME1     | 0.521 | 0.271450173 |
| PACSIN3 | 0.652 | 0.564403023 | MID1    | 1.51  | 0.510168578 |
| DYNLT1  | 0.655 | 0.559955102 | AP3S1   | 1.505 | 0.852477227 |
| S100A11 | 0.511 | 0.011363099 | CMAS    | 1.697 | 0.756636323 |
| PLRG1   | 1.973 | 0.091013002 | MRPL21  | 1.52  | 0.852477227 |
| TEX10   | 2.66  | 0.011841971 | NHEJ1   | 1.913 | 0.532851417 |
| NPM3    | 0.643 | 0.515909661 | SLC29A1 | 0.416 | 0.089818216 |
| PSPC1   | 0.602 | 0.408305469 | SLAIN2  | 0.411 | 0.103174745 |
| ILVBL   | 1.526 | 0.851216459 | NSA2    | 0.608 | 0.763520909 |
| EIF4H   | 0.638 | 0.416263925 | MRPL13  | 1.819 | 0.649384157 |
| PAPSS1  | 1.55  | 0.845738551 | PPCDC   | 0.482 | 0.403693555 |
| VASP    | 0.517 | 0.18537471  | INPP1   | 1.55  | 0.845738551 |
| SH3GLB2 | 0.614 | 0.701151981 | GEMIN4  | 1.713 | 0.56337224  |
| GATAD2B | 0.652 | 0.564403023 | CCS     | 0.566 | 0.440574981 |
| DNAJC17 | 0.635 | 0.471048378 | GNG5    | 0.495 | 0.087787492 |
| ABI1    | 1.657 | 0.668250181 | CBWD6   | 0.638 | 0.668250181 |
| HMGNI   | 0.648 | 0.288721285 | CD63    | 0.469 | 0.105689461 |
| HNRNPLL | 1.61  | 0.724896883 | MRPL22  | 2.951 | 0.031886366 |
| PANX1   | 1.779 | 0.170046899 | CD320   | 0.557 | 0.475152981 |
| SARM1   | 1.642 | 0.771388179 | CKMT1B  | 1.749 | 0.685771375 |
| SQLE    | 1.689 | 0.408305469 | CETN3   | 0.601 | 0.59324337  |
| ALDH3A2 | 1.59  | 0.463682717 | KIF14   | 1.719 | 0.773194989 |
| CDC73   | 2.103 | 0.0854973   | GTF2A1  | 0.57  | 0.463682717 |
| COL1A1  | 0.64  | 0.427351724 | POLR2F  | 0.275 | 0.000115393 |
| SEC24A  | 1.666 | 0.523349939 | KLHL12  | 0.561 | 0.422612594 |
| DBT     | 1.592 | 0.452895108 | DERL1   | 1.506 | 0.852477227 |
| EHHADH  | 1.53  | 0.552433692 | URB2    | 0.5   | 0.271495663 |
| NOL9    | 1.537 | 0.841878466 | RER1    | 1.732 | 0.750794999 |
| AHSG    | 0.289 | 3.35428E-07 | PKP2    | 1.559 | 0.84009918  |
| PITHD1  | 1.554 | 0.663950806 | PEBP1   | 0.659 | 0.727575986 |
| TXNDC9  | 0.651 | 0.550671386 | NFYB    | 0.647 | 0.568682884 |
| RPS27   | 0.608 | 0.343204913 | PPP1R9B | 0.465 | 0.452611466 |
| CDC123  | 0.605 | 0.406714997 | TIMMDC1 | 1.523 | 0.852477227 |
| TIAL1   | 1.511 | 0.678554765 | MAGT1   | 1.525 | 0.843623064 |
| ARL8B   | 1.646 | 0.564403023 | SERINC1 | 0.398 | 0.233121719 |
| CD99    | 0.505 | 0.200560193 | ZNF143  | 0.623 | 0.703907733 |
| RAB8A   | 1.503 | 0.784308009 | PIP4K2B | 0.513 | 0.213644086 |
| CDK2    | 1.648 | 0.388794005 | PTMS    | 1.601 | 0.668674441 |

|        |       |             |         |       |             |
|--------|-------|-------------|---------|-------|-------------|
| SRP14  | 0.637 | 0.398785959 | TOMM5   | 0.656 | 0.454406254 |
| MAN2A1 | 1.564 | 0.571779314 | GGA2    | 0.599 | 0.32227613  |
| HTRA2  | 1.946 | 0.370352145 | VBP1    | 0.554 | 0.263773061 |
| BAG5   | 1.629 | 0.765714922 | NUCKS1  | 0.438 | 0.162296587 |
| GPR89A | 2.172 | 0.194513363 | FAM175B | 0.617 | 0.757807277 |
| MRPL37 | 1.537 | 0.727559415 | RNF181  | 0.489 | 0.164697926 |
| VPS25  | 0.504 | 0.182316266 | NLRP13  | 0.583 | 0.327016649 |
| RAB3B  | 1.54  | 0.843623064 | C2orf18 | 0.366 | 0.019050364 |
| BMS1   | 1.58  | 0.527315589 | TWISTNB | 0.529 | 0.564403023 |
| PARD3  | 0.501 | 0.201636268 | MIF     | 0.654 | 0.482623135 |
| RAB8B  | 1.519 | 0.80229918  | JTB     | 0.457 | 0.398785959 |
| SEC62  | 0.632 | 0.398785959 | ANKRD40 | 0.583 | 0.734018866 |
| IPO8   | 3.392 | 0.018974058 | LTV1    | 1.554 | 0.668250181 |

Table S4. Differentially expressed proteins in GES1 cocultured with increasing concentrations of 400 (1:1, 10:1 or 50:1).

400 – 1:1

| Gene Name | Sample/Control | P-Value     | Gene Name | Sample/Control | P-Value     |
|-----------|----------------|-------------|-----------|----------------|-------------|
| PDIA4     | 0.426          | 0.208414679 | NRBP1     | 2.2            | 0.680564653 |
| CAD       | 2.1            | 0.781074026 | TYMS      | 6.569          | 0.000247896 |
| TUBB4A    | 2.908          | 0.241373403 | PAFAH1B2  | 2.459          | 0.468191393 |
| ATIC      | 2              | 0.842418501 | B3GAT3    | 0.388          | 0.382069426 |
| HSPH1     | 2.02           | 0.830560411 | CD59      | 0.453          | 0.250392307 |
| TXNRD1    | 2.278          | 0.677517809 | TUBA4B    | 3.288          | 0.223523482 |
| GART      | 2.2            | 0.71539508  | FADD      | 2.874          | 0.326066592 |
| HLA-A     | 0.478          | 0.342430406 | SLC25A1   | 0.485          | 0.60195852  |
| HLA-A     | 0.394          | 0.258055221 | STK39     | 3.042          | 0.118972379 |
| EIF4A1    | 2              | 0.842418501 | SLC44A1   | 0.36           | 0.195335559 |
| IPO5      | 2.226          | 0.626200359 | SGTA      | 2.206          | 0.54792622  |
| HIST1H4A  | 0.418          | 0.18814956  | CRAT      | 0.462          | 0.512064155 |
| RNH1      | 2.298          | 0.675698472 | CDK6      | 2.422          | 0.582454963 |
| EIF5A     | 2.484          | 0.566631843 | ATAD2     | 0.415          | 0.329556223 |
| PPME1     | 3.506          | 0.118019848 | GDA       | 2.273          | 0.539592388 |
| PPA1      | 2.166          | 0.737322251 | DCTPP1    | 2.574          | 0.396931576 |
| GLG1      | 0.49           | 0.472707811 | HMBS      | 2.882          | 0.250392307 |
| PFAS      | 2.259          | 0.615525627 | ADSS      | 2.025          | 0.726043726 |
| HLA-B     | 0.428          | 0.212980605 | H1FX      | 0.482          | 0.356972144 |
| KRT10     | 0.485          | 0.36696014  | GBAS      | 0.478          | 0.688280195 |
| KRT2      | 0.461          | 0.314163478 | SSSCA1    | 2.183          | 0.662668693 |
| CTPS1     | 2.087          | 0.779348841 | DPM1      | 0.495          | 0.600675386 |
| P4HA1     | 0.467          | 0.274458107 | MPZL1     | 0.473          | 0.655078001 |
| AGRN      | 0.325          | 0.087936095 | IL18      | 3.176          | 0.158335947 |



|           |       |             |          |       |             |
|-----------|-------|-------------|----------|-------|-------------|
| GARS      | 2.243 | 0.677517809 | COL18A1  | 0.346 | 0.251405535 |
| GSPT1     | 2.267 | 0.559928362 | PRAF2    | 0.466 | 0.539592388 |
| IPO7      | 2.095 | 0.679938571 | INA      | 2.756 | 0.433417538 |
| UCHL1     | 2.235 | 0.691393453 | SUZ12    | 0.338 | 0.272452709 |
| IDH2      | 0.386 | 0.118972379 | OGFOD1   | 4.866 | 0.012996853 |
| HINT1     | 2.032 | 0.80431144  | IRGQ     | 4.336 | 0.02982474  |
| KPNA2     | 2.118 | 0.726043726 | AATF     | 2.222 | 0.691393453 |
| P4HA2     | 0.475 | 0.326066592 | BRI3BP   | 0.394 | 0.359599806 |
| EIF6      | 2.008 | 0.835409852 | ERMP1    | 0.402 | 0.323196658 |
| HSPG2     | 0.29  | 0.02788012  | SLC25A11 | 0.469 | 0.547313445 |
| NAP1L1    | 3.258 | 0.178811953 | ITPA     | 2.599 | 0.370802191 |
| SMS       | 2.307 | 0.539592388 | MFF      | 0.373 | 0.161677004 |
| CKB       | 2.216 | 0.604685614 | TXNDC17  | 2.046 | 0.643537697 |
| LAMC1     | 0.467 | 0.539592388 | TXNDC9   | 2.017 | 0.779556437 |
| NME2      | 2.315 | 0.661104497 | DCXR     | 0.431 | 0.606114783 |
| PSAT1     | 3.198 | 0.199011287 | SAP18    | 0.307 | 0.061745104 |
| CDV3      | 2.055 | 0.717916023 | RBM3     | 2.363 | 0.604685614 |
| SRM       | 2.571 | 0.329556223 | ZNF259   | 2.603 | 0.37552137  |
| TPM1      | 2.014 | 0.834136516 | GNG10    | 0.279 | 0.067460713 |
| ICAM1     | 0.441 | 0.250392307 | AK4      | 0.482 | 0.626200359 |
| CSDA      | 2.134 | 0.622180671 | LSM1     | 2.357 | 0.56313518  |
| LAMA5     | 0.417 | 0.374113244 | EFHD2    | 2.039 | 0.706761263 |
| NME1      | 2.041 | 0.815805597 | DUSP12   | 2.221 | 0.572549568 |
| BTF3      | 2.903 | 0.195093195 | TGFBI    | 0.212 | 0.018891587 |
| HSDL2     | 0.447 | 0.507121591 | CD40     | 0.358 | 0.24136589  |
| FN1       | 0.446 | 0.403435872 | PEX11B   | 0.429 | 0.320000215 |
| HIST1H2BJ | 0.449 | 0.264776935 | LGMN     | 0.427 | 0.356036684 |
| PEA15     | 2.251 | 0.600675386 | UCK2     | 2.531 | 0.392958318 |
| MFI2      | 0.251 | 0.007639984 | FYTTD1   | 0.423 | 0.379538509 |
| CAPRIN1   | 2.034 | 0.645332613 | VMP1     | 3.436 | 0.074476815 |
| FHL2      | 2.851 | 0.2003263   | TARS2    | 0.454 | 0.399626613 |
| PXDN      | 0.479 | 0.561827682 | AGPAT1   | 0.392 | 0.405101184 |
| FABP5     | 2.75  | 0.314163478 | CBS      | 3.208 | 0.133240452 |
| TAGLN     | 2.182 | 0.726043726 | TMEM41B  | 0.402 | 0.32439416  |
| EEF1B2    | 3     | 0.264776935 | PCCB     | 0.455 | 0.652639683 |
| ANXA3     | 2.464 | 0.582454963 | TPRKB    | 2.076 | 0.670372272 |
| NAP1L4    | 2.069 | 0.600675386 | CSRP2    | 0.441 | 0.512064155 |
| BCCIP     | 2.12  | 0.601910419 | SRC      | 0.246 | 0.021425564 |
| HP1BP3    | 0.376 | 0.100549648 | TBRG4    | 2.508 | 0.539592388 |
| NPM3      | 2.137 | 0.659855906 | MMP14    | 0.463 | 0.677517809 |
| CDKN2A    | 2.958 | 0.140560658 | DRG2     | 2.185 | 0.604685614 |
| UTRN      | 2.147 | 0.710261307 | NDUFAB1  | 2.808 | 0.263817676 |
| UAP1      | 2.789 | 0.362792124 | ZNF280C  | 0.467 | 0.624408171 |
| TPT1      | 3.11  | 0.168468564 | MYO1E    | 2.056 | 0.70134445  |

|          |       |             |          |       |             |
|----------|-------|-------------|----------|-------|-------------|
| TAPBP    | 0.482 | 0.533602482 | STX7     | 0.493 | 0.620959685 |
| HIST1H1A | 0.414 | 0.274743906 | ABRACL   | 2.65  | 0.342430406 |
| ALDH6A1  | 0.35  | 0.118972379 | USP48    | 2.471 | 0.58135961  |
| MTAP     | 2.274 | 0.483538295 | MINPP1   | 0.384 | 0.2003263   |
| EIF3J    | 2.231 | 0.629885087 | HYPK     | 2.587 | 0.463582339 |
| GNAI1    | 0.454 | 0.47628034  | CRLF3    | 2.671 | 0.330442313 |
| SOD2     | 0.363 | 0.08036259  | TGOLN2   | 0.437 | 0.507121591 |
| HSPBP1   | 2.144 | 0.676041398 | RRP7A    | 2.064 | 0.601910419 |
| ABCF2    | 2.039 | 0.600675386 | ABHD16A  | 0.384 | 0.426957778 |
| GOLIM4   | 0.493 | 0.624408171 | DNAJC17  | 2.163 | 0.691393453 |
| BOLA2B   | 2.131 | 0.507121591 | DR1      | 2.965 | 0.301961443 |
| TXN      | 2.293 | 0.677517809 | PEX14    | 0.444 | 0.435927741 |
| PTGFRN   | 0.479 | 0.597418951 | C12orf5  | 2.921 | 0.168468564 |
| SUN2     | 0.274 | 0.084081126 | CTH      | 2.078 | 0.746307268 |
| GLRX3    | 2.091 | 0.609386373 | TGFB1I1  | 3.241 | 0.165844966 |
| TAP1     | 0.484 | 0.60195852  | SQRDL    | 0.366 | 0.320000215 |
| NTMT1    | 2.302 | 0.448551937 | MMGT1    | 0.487 | 0.691393453 |
| EIF3M    | 2.207 | 0.656224494 | CCDC90B  | 0.48  | 0.653829931 |
| NACA     | 2.319 | 0.606924903 | BAK1     | 0.296 | 0.050599892 |
| RIC8A    | 2.218 | 0.613474807 | PLGRKT   | 0.497 | 0.600675386 |
| ITPR3    | 0.498 | 0.67806416  | DCAF7    | 2.017 | 0.657062228 |
| ASNS     | 4.905 | 0.004601805 | SCPEP1   | 0.282 | 0.129571812 |
| HADH     | 0.319 | 0.098444083 | PAPOLA   | 0.477 | 0.524508608 |
| PNP      | 2.026 | 0.645332613 | JAGN1    | 0.311 | 0.088610451 |
| GRWD1    | 2.212 | 0.559928362 | ACOT13   | 0.497 | 0.667429081 |
| B2M      | 0.342 | 0.051438599 | C20orf27 | 2.138 | 0.71539508  |
| IDI1     | 2.19  | 0.657062228 | MECP2    | 0.361 | 0.263817676 |
| RPLP1    | 2.457 | 0.46077815  | VPS52    | 2.065 | 0.749155411 |
| TRMT112  | 2.543 | 0.333248864 | DPM3     | 0.478 | 0.606984703 |
| BCAT1    | 3.8   | 0.03260109  | SELT     | 2.224 | 0.699391533 |
| EIF3F    | 2.008 | 0.67744545  | WIBG     | 0.415 | 0.561827682 |
| PUS7     | 2.1   | 0.677517809 | CD47     | 0.381 | 0.264029858 |
| KPNA3    | 3.052 | 0.16427082  | ATG4B    | 2.581 | 0.314163478 |
| FAM98B   | 3.191 | 0.162820326 | LACTB2   | 2.094 | 0.70134445  |
| PSPH     | 2.914 | 0.126333291 | MRPL28   | 2.66  | 0.472707811 |
| TUBG1    | 2.1   | 0.679938571 | PPIC     | 0.475 | 0.634978248 |
| RAB8B    | 0.465 | 0.604809839 | CD63     | 0.34  | 0.112478375 |
| EIF1     | 2.75  | 0.273908476 | OPTN     | 2.281 | 0.659484956 |
| SYAP1    | 2.545 | 0.507121591 | ACOT2    | 0.476 | 0.600675386 |
| METAP2   | 2.712 | 0.326066592 | SAP130   | 0.367 | 0.217341652 |
| NDUFA7   | 0.387 | 0.223523482 | USP11    | 0.391 | 0.2488261   |
| HMGN1    | 0.335 | 0.122832659 | COX7C    | 0.403 | 0.366636807 |
| PBXIP1   | 0.492 | 0.606924903 | MRPL10   | 2.74  | 0.466020675 |
| SDPR     | 2.149 | 0.644650645 | GPRC5A   | 2.211 | 0.691393453 |

|           |       |             |          |       |             |
|-----------|-------|-------------|----------|-------|-------------|
| NUBP2     | 2.865 | 0.264776935 | ARHGEF12 | 0.469 | 0.483925889 |
| NAA10     | 2.06  | 0.643537697 | HTRA1    | 0.29  | 0.10017458  |
| HIST2H2AB | 2.545 | 0.512064155 | TOMM5    | 0.351 | 0.161677004 |
| NDUFB7    | 0.428 | 0.333248864 | AP1M2    | 0.404 | 0.158249308 |
| TAP2      | 0.397 | 0.472707811 | FAM184B  | 0.43  | 0.217341652 |
| ADAM10    | 0.469 | 0.680959387 | RBX1     | 0.473 | 0.533602482 |
| GIPC1     | 2.123 | 0.677517809 | PLCH1    | 0.432 | 0.468731645 |
| JMJD6     | 2.211 | 0.680959387 | DIEXF    | 0.498 | 0.540136401 |
| H1FO      | 0.329 | 0.037802229 | SLC44A2  | 0.439 | 0.512064155 |
| PPP2R5D   | 3.929 | 0.054781381 |          |       |             |

400 – 10:1

| Gene Name | Sample/Control | P-Value     | Gene Name | Sample/Control | P-Value     |
|-----------|----------------|-------------|-----------|----------------|-------------|
| FLNC      | 2.06           | 0.403135449 | CAT       | 0.402          | 0.157507733 |
| EEF1A1    | 2.004          | 0.444670276 | RP2       | 0.425          | 0.211487273 |
| MKI67     | 0.406          | 0.036719364 | FADD      | 2.309          | 0.446479758 |
| PDIA4     | 0.474          | 0.118110837 | F5        | 2.782          | 0.086830828 |
| CAD       | 2.101          | 0.377049514 | PTMA      | 0.344          | 0.016427705 |
| TUBB4A    | 2.671          | 0.114210052 | STK39     | 2.279          | 0.492951032 |
| SLC3A2    | 2.168          | 0.327538828 | HMMR      | 23.575         | 2.06217E-16 |
| HLA-A     | 0.4            | 0.050174553 | SLC44A1   | 0.378          | 0.086047559 |
| EIF4A1    | 2.594          | 0.118238844 | SGTA      | 2.084          | 0.421112858 |
| NSUN2     | 2.152          | 0.324791289 | CDK6      | 3.031          | 0.107311117 |
| RRBP1     | 0.314          | 0.005757801 | ATAD2     | 0.482          | 0.306034031 |
| IMPDH2    | 2.018          | 0.433281617 | UCHL3     | 2.442          | 0.213349268 |
| SMC3      | 0.456          | 0.095175528 | UBE2S     | 3.532          | 0.01599774  |
| RNH1      | 2.029          | 0.427601761 | CHCHD2P9  | 0.325          | 0.036719364 |
| EIF5A     | 2.312          | 0.238015821 | ATP6AP1   | 2.331          | 0.420404318 |
| KRT1      | 0.372          | 0.017343213 | MAP2K3    | 2.582          | 0.231744419 |
| PPME1     | 2.496          | 0.156873904 | WBSCR22   | 2.363          | 0.356848851 |
| PPA1      | 2.069          | 0.400106787 | H1FX      | 0.414          | 0.042976563 |
| GLG1      | 0.251          | 0.000497953 | SSSCA1    | 2.226          | 0.427601761 |
| HLA-B     | 0.493          | 0.152337829 | ISG15     | 3.626          | 0.009682622 |
| HSPA2     | 0.467          | 0.264635672 | C3        | 4.258          | 0.010546361 |
| KRT2      | 0.325          | 0.00497766  | MPZL1     | 0.452          | 0.295644401 |
| CTPS1     | 2.246          | 0.277134903 | RHOT1     | 0.428          | 0.123264198 |
| P4HA1     | 0.467          | 0.101858277 | IL18      | 2.616          | 0.196878937 |
| AGRN      | 0.445          | 0.20451879  | RPL7L1    | 3.116          | 0.068753415 |
| BASP1     | 0.373          | 0.017699902 | AHSG      | 2.477          | 0.159805474 |
| RPSA      | 2.129          | 0.357927259 | COL18A1   | 0.321          | 0.036878526 |
| EPHA2     | 2.121          | 0.395757536 | GPR89A    | 4.326          | 0.006023159 |
| KRT9      | 0.331          | 0.008648218 | INA       | 2.745          | 0.295644401 |
| RPLP2     | 2.488          | 0.155920424 | OGFOD1    | 2.362          | 0.394983609 |

|           |       |             |          |        |             |
|-----------|-------|-------------|----------|--------|-------------|
| EIF4G2    | 2.29  | 0.208866916 | IRGQ     | 4.929  | 0.001836522 |
| EIF6      | 2.376 | 0.187057863 | AATF     | 2.089  | 0.549191664 |
| PLOD2     | 0.388 | 0.028668861 | CUL2     | 2.06   | 0.403135449 |
| EEF1D     | 2.133 | 0.354761112 | PCYT1A   | 2.277  | 0.328262623 |
| HSPG2     | 0.233 | 0.000829015 | IFITM3   | 0.236  | 0.007018598 |
| NAP1L1    | 3.125 | 0.030110702 | SOAT1    | 2.409  | 0.264635672 |
| GNB1      | 0.459 | 0.116090667 | ITPA     | 2.236  | 0.383764414 |
| GEMIN5    | 2.073 | 0.372748092 | NIT1     | 0.476  | 0.252435514 |
| SCRN1     | 2.46  | 0.156873904 | PZP      | 12.228 | 7.91811E-07 |
| PPP2R1B   | 2.012 | 0.415482626 | FIP1L1   | 3.101  | 0.080370214 |
| SRM       | 2.645 | 0.108928838 | SAP18    | 0.472  | 0.264635672 |
| L1CAM     | 0.335 | 0.021218168 | CXorf26  | 2.197  | 0.40261756  |
| ICAM1     | 0.279 | 0.0008258   | TRA2A    | 2.58   | 0.130664718 |
| MRC2      | 0.35  | 0.037948626 | ZNF259   | 2.191  | 0.407554567 |
| LAMA5     | 0.487 | 0.367464392 | GNG10    | 0.384  | 0.095658297 |
| WDHD1     | 0.487 | 0.30088881  | PHF5A    | 0.375  | 0.096270397 |
| CSDE1     | 2.349 | 0.206235839 | CCDC6    | 2      | 0.667857063 |
| BCAM      | 0.364 | 0.031010117 | TGFBI    | 0.279  | 0.025933744 |
| ACSF2     | 0.378 | 0.045759925 | DDX31    | 2.012  | 0.645727978 |
| PTK7      | 0.447 | 0.16051169  | CD40     | 0.444  | 0.260795756 |
| BTF3      | 3.356 | 0.0172045   | MARCKSL1 | 0.124  | 2.00844E-06 |
| CTSB      | 0.383 | 0.022649646 | F2       | 6.071  | 0.00010089  |
| PEA15     | 2.329 | 0.196878937 | LGMN     | 0.388  | 0.079004632 |
| MFI2      | 0.231 | 0.000769664 | CLPTM1   | 2.073  | 0.618110641 |
| FHL2      | 2.534 | 0.167678087 | PKP2     | 4.73   | 0.012805674 |
| PXDN      | 0.352 | 0.052231381 | GEMIN4   | 2.148  | 0.407860518 |
| TTLL12    | 2.21  | 0.268581209 | FYTTD1   | 0.438  | 0.180839333 |
| SQSTM1    | 4.361 | 0.00167399  | A2M      | 3.185  | 0.024506547 |
| ANP32B    | 2.042 | 0.403135449 | SLC16A3  | 0.391  | 0.06920213  |
| HIST1H2AG | 0.367 | 0.015639757 | ATP6AP2  | 2.486  | 0.334886977 |
| HIST1H1B  | 0.426 | 0.053942649 | EXOC4    | 0.237  | 0.005612212 |
| UMPS      | 2.016 | 0.427601761 | CBS      | 3.631  | 0.053681082 |
| WDR55     | 2.005 | 0.467523593 | TMEM41B  | 0.125  | 5.21123E-07 |
| EEF1B2    | 3.299 | 0.017699902 | CLNS1A   | 2.383  | 0.311398635 |
| NAP1L4    | 2.135 | 0.337582569 | PCCB     | 0.453  | 0.349462949 |
| BCCIP     | 2.024 | 0.403135449 | CIRBP    | 2.173  | 0.452221195 |
| HP1BP3    | 0.434 | 0.058952114 | TPRKB    | 2.388  | 0.430133131 |
| NPM3      | 2.066 | 0.529491706 | COMMD3   | 2.746  | 0.252435514 |
| CDKN2A    | 4.33  | 0.002333192 | CSRP2    | 0.435  | 0.289936487 |
| UAP1      | 2.389 | 0.197692099 | ZCCHC8   | 2.136  | 0.580646967 |
| TPT1      | 3.264 | 0.016438798 | GID8     | 2.378  | 0.427747288 |
| HIST1H1A  | 0.327 | 0.023254133 | SLC2A1   | 0.499  | 0.392468121 |
| HIST1H2AB | 0.458 | 0.093553086 | NUBP1    | 2.348  | 0.40261756  |
| ALDH6A1   | 0.302 | 0.014803277 | MMP14    | 0.232  | 0.004634842 |

|           |       |             |          |        |             |
|-----------|-------|-------------|----------|--------|-------------|
| PSIP1     | 0.324 | 0.008199884 | L2HGDH   | 0.398  | 0.103932547 |
| C14orf166 | 2.089 | 0.383813665 | DRG2     | 2.01   | 0.642705283 |
| IPO4      | 3.226 | 0.038949887 | NDUFAB1  | 3.074  | 0.098825535 |
| TSR1      | 2.093 | 0.450151401 | ITIH2    | 3.021  | 0.047657506 |
| HBA2      | 7.304 | 6.0334E-07  | STX7     | 0.435  | 0.223237904 |
| THBS1     | 3.49  | 0.027752584 | TP53I3   | 4.787  | 0.002063324 |
| GNAI1     | 0.369 | 0.070114475 | HS1BP3   | 2.127  | 0.566851791 |
| HLTF      | 0.349 | 0.071365765 | APOA1    | 2.459  | 0.169218718 |
| SOD2      | 0.333 | 0.005807716 | PUS1     | 23.676 | 2.06217E-16 |
| HSPBP1    | 2.931 | 0.115524197 | ABRACL   | 2.272  | 0.40261756  |
| ABCF2     | 2.74  | 0.091098925 | SPTLC2   | 0.357  | 0.116916585 |
| RPL26     | 0.462 | 0.15106058  | CCDC86   | 2.023  | 0.467523593 |
| RPS10     | 2.039 | 0.414298188 | NENF     | 2.069  | 0.596251259 |
| KRAS      | 0.488 | 0.258626584 | HYPK     | 2.565  | 0.252435514 |
| GOLM1     | 0.37  | 0.076614338 | TGOLN2   | 0.329  | 0.054761928 |
| SUN2      | 0.236 | 0.003120305 | DDTL     | 2.487  | 0.220696923 |
| SIN3A     | 0.497 | 0.367884574 | ACYP1    | 0.4    | 0.133829838 |
| UBXN1     | 2.013 | 0.426155573 | TRMT61A  | 2.229  | 0.49628079  |
| BRD4      | 0.419 | 0.168334428 | ELOVL1   | 0.435  | 0.234623142 |
| NTMT1     | 2.5   | 0.151187879 | SNX4     | 2.855  | 0.267687276 |
| EIF3M     | 2.002 | 0.560734082 | DR1      | 2.3    | 0.433281617 |
| NACA      | 2.292 | 0.298372446 | ALG5     | 3.287  | 0.085639293 |
| CAV1      | 2.765 | 0.066404016 | C12orf5  | 3.397  | 0.074895588 |
| RIC8A     | 2.536 | 0.201390034 | GOPC     | 2.063  | 0.570036739 |
| GATAD2B   | 0.498 | 0.358341096 | OTUD6B   | 3.107  | 0.108750572 |
| ASNS      | 3.476 | 0.023254133 | SLC27A2  | 2.51   | 0.321195009 |
| HADH      | 0.289 | 0.00283268  | TGFB1I1  | 3.75   | 0.067921398 |
| GRWD1     | 3.369 | 0.021306704 | SQRDL    | 0.403  | 0.196878937 |
| B2M       | 0.22  | 3.4738E-05  | SULT1A1  | 0.391  | 0.134954743 |
| RPLP1     | 3.609 | 0.005076117 | UQCRQ    | 2.047  | 0.446479758 |
| HPCAL1    | 0.464 | 0.257211287 | SLC25A15 | 2.202  | 0.427601761 |
| TRMT112   | 3.547 | 0.009163992 | CPD      | 2.109  | 0.324791289 |
| BCAT1     | 2.68  | 0.208042459 | HBD      | 4.147  | 0.001694515 |
| EIF3F     | 2.092 | 0.403135449 | DCAF7    | 4.273  | 0.009697999 |
| KPNA3     | 2.375 | 0.301424998 | LSR      | 0.275  | 0.024094154 |
| ALB       | 3.177 | 0.024837458 | TRIM26   | 2.053  | 0.590075279 |
| EIF3G     | 2.292 | 0.267687276 | SCPEP1   | 0.29   | 0.044072344 |
| SRSF11    | 2.05  | 0.377286491 | JAGN1    | 0.206  | 0.001436608 |
| CTSZ      | 0.39  | 0.102350472 | ACOT13   | 0.46   | 0.274139269 |
| TTC1      | 2.071 | 0.33902736  | C1orf198 | 2.03   | 0.665916448 |
| SCAMP1    | 0.493 | 0.306163484 | SIRT1    | 2.808  | 0.233821644 |
| HSPA14    | 2.484 | 0.26370811  | MRGBP    | 2.987  | 0.143915404 |
| TUBG1     | 2.905 | 0.085637635 | C20orf27 | 2.251  | 0.487362495 |
| BRD3      | 0.311 | 0.012026163 | MRPL17   | 2.248  | 0.49628079  |

|           |        |             |          |       |             |
|-----------|--------|-------------|----------|-------|-------------|
| HK2       | 2.468  | 0.256717499 | MECP2    | 0.486 | 0.339741119 |
| FAM162A   | 0.498  | 0.358430676 | LTF      | 3.909 | 0.003845934 |
| CDK11B    | 2.101  | 0.358430676 | DPM3     | 0.429 | 0.219008782 |
| NOC4L     | 2.111  | 0.358341294 | FAM129A  | 3.135 | 0.027858508 |
| EIF1      | 4.063  | 0.011309277 | C2orf18  | 0.259 | 0.004007642 |
| NLE1      | 2.778  | 0.13292495  | DCUN1D5  | 2.159 | 0.428940581 |
| PNO1      | 2.052  | 0.49819879  | VAMP5    | 0.462 | 0.326772931 |
| ACADM     | 0.449  | 0.210297086 | BRCC3    | 55.58 | 2.06217E-16 |
| METAP2    | 3.423  | 0.053037533 | PIN4     | 0.439 | 0.264635672 |
| NDUFA7    | 0.284  | 0.011663314 | CMBL     | 2.281 | 0.52445279  |
| ZNF638    | 2.024  | 0.488963231 | RRP15    | 2.306 | 0.348025063 |
| HMG1      | 0.185  | 0.000208196 | CASP3    | 3.206 | 0.10496257  |
| ZNF622    | 2.482  | 0.199314299 | MRPL28   | 2.397 | 0.427601761 |
| GC        | 2.376  | 0.271873622 | CD63     | 0.381 | 0.128828906 |
| SDPR      | 2.349  | 0.331264408 | OPTN     | 2.225 | 0.532682295 |
| NUBP2     | 3.233  | 0.068164665 | GSK3A    | 2.276 | 0.49474858  |
| ANKHD1    | 3.131  | 0.139109483 | SCARB1   | 2.371 | 0.30088881  |
| VTN       | 2.482  | 0.188533922 | SAP130   | 0.493 | 0.334886977 |
| NAA10     | 2.249  | 0.264635672 | SRP9     | 0.394 | 0.064449466 |
| PRKAR1A   | 2.048  | 0.49628079  | HSD17B7  | 0.459 | 0.329685422 |
| HSP90AA4P | 2.04   | 0.55678996  | BKPyVgp5 | 0.418 | 0.147587747 |
| GLB1      | 0.445  | 0.295644401 | APOM     | 4.059 | 0.022649646 |
| ADAM10    | 0.439  | 0.261916163 | MRPL10   | 3.302 | 0.174676485 |
| GIPC1     | 2.214  | 0.360785137 | MRPL35   | 2.799 | 0.196878937 |
| BZW1      | 2.727  | 0.123958292 | DIRAS2   | 4.135 | 0.003182777 |
| DNAJC10   | 0.381  | 0.116515627 | HTRA1    | 0.298 | 0.074640622 |
| JMJD6     | 2.888  | 0.138307783 | LXN      | 0.478 | 0.38188778  |
| H1FO      | 0.188  | 3.46914E-06 | FAM105B  | 2.013 | 0.64271192  |
| PPP2R5D   | 2.728  | 0.222658277 | RAI1     | 3.739 | 0.046122774 |
| CLPTM1L   | 2.286  | 0.306034031 | RBX1     | 0.456 | 0.1926748   |
| TYMS      | 3.273  | 0.053681082 | CEP290   | 2.639 | 0.114323769 |
| PAFAH1B2  | 2.404  | 0.305544601 | RNGTT    | 2.737 | 0.178943426 |
| UBXN4     | 0.256  | 0.002943199 | SLC44A2  | 0.313 | 0.059702389 |
| HBG1      | 19.229 | 2.26974E-14 | MAN1B1   | 0.449 | 0.313320609 |
| MRPS36    | 0.285  | 0.021218168 | TUBA4B   | 2.436 | 0.403135449 |
| PURA      | 2.285  | 0.374560925 |          |       |             |

400 – 50:1

| Gene Name | Sample/Control | P-Value     | Gene Name | Sample/Control | P-Value     |
|-----------|----------------|-------------|-----------|----------------|-------------|
| FLNC      | 2.21           | 0.139100361 | HEXIM1    | 2.232          | 0.442047603 |
| MKI67     | 0.343          | 0.012140326 | MAP2K3    | 3.252          | 0.073244608 |
| TUBB      | 2.409          | 0.078344833 | SH3GLB2   | 0.426          | 0.159556164 |
| PARP1     | 0.488          | 0.176287491 | WBSCR22   | 2.179          | 0.406576909 |

|         |       |             |          |        |             |
|---------|-------|-------------|----------|--------|-------------|
| CAD     | 2.38  | 0.085029147 | HIFX     | 0.357  | 0.017620169 |
| TUBB4A  | 2.72  | 0.078996542 | TMSB4X   | 0.371  | 0.151637054 |
| TUBA4A  | 2.036 | 0.220762605 | SSSCA1   | 2.332  | 0.30240431  |
| SLC3A2  | 2.296 | 0.108001726 | ISG15    | 2.304  | 0.262689067 |
| TUBB3   | 2.129 | 0.327037142 | C3       | 8.266  | 3.65473E-06 |
| HNRNPA3 | 0.459 | 0.125161364 | ALDH5A1  | 0.497  | 0.410083399 |
| TUBB6   | 2.085 | 0.197565656 | RHOT1    | 0.463  | 0.272485933 |
| HLA-A   | 0.43  | 0.091263351 | IL18     | 2.337  | 0.315408003 |
| EIF4A1  | 2.699 | 0.032578918 | RPL7L1   | 3.06   | 0.08761642  |
| NSUN2   | 2.53  | 0.047697314 | AHSG     | 3.289  | 0.005603633 |
| RRBP1   | 0.305 | 0.003931982 | COL18A1  | 0.47   | 0.359202147 |
| IMPDH2  | 2.107 | 0.1807592   | GPR89A   | 7.69   | 4.12804E-05 |
| NAMPT   | 0.479 | 0.162234435 | INA      | 3.104  | 0.328054018 |
| DDX3X   | 2.015 | 0.23229926  | NDUFA2   | 0.376  | 0.151637054 |
| GLG1    | 0.271 | 0.001332034 | ATP6V1E1 | 2.294  | 0.269594696 |
| HLA-B   | 0.452 | 0.112969587 | OGFOD1   | 2.251  | 0.619359793 |
| HSPA2   | 0.497 | 0.416515252 | IRGQ     | 2.651  | 0.433002822 |
| CTPS1   | 2.545 | 0.055304548 | AATF     | 3.56   | 0.096505241 |
| PABPC4  | 2.085 | 0.145370834 | ARPC5    | 0.489  | 0.352436638 |
| BASP1   | 0.325 | 0.00734166  | CUL2     | 2.022  | 0.233262998 |
| RPL9    | 2.05  | 0.212518134 | ERMP1    | 0.341  | 0.064512112 |
| RPSA    | 2.036 | 0.220759793 | PCYT1A   | 2.291  | 0.223576249 |
| EPHA2   | 2.411 | 0.065191411 | TST      | 0.475  | 0.278412231 |
| PCBP2   | 2.025 | 0.226708252 | FBLN1    | 3.502  | 0.040970813 |
| RPLP2   | 2.181 | 0.150815589 | IFITM3   | 0.268  | 0.011125772 |
| EIF4G2  | 2.419 | 0.063649749 | SOAT1    | 2.964  | 0.104492987 |
| EIF6    | 2.129 | 0.169055152 | ITPA     | 2.008  | 0.502442921 |
| PLOD2   | 0.421 | 0.07197492  | NIT1     | 0.413  | 0.155941832 |
| HSPG2   | 0.196 | 0.000278995 | RAB6B    | 2.131  | 0.503007786 |
| NAP1L1  | 3.28  | 0.004688618 | MLLT4    | 4.732  | 0.006563319 |
| GNB1    | 0.482 | 0.15935463  | HELLS    | 0.488  | 0.329998258 |
| GEMIN5  | 2.194 | 0.272296037 | PZP      | 16.845 | 5.39527E-08 |
| SCRN1   | 3.013 | 0.013524828 | PC       | 2.527  | 0.181994008 |
| DDX39A  | 2.081 | 0.350054676 | FIP1L1   | 3.389  | 0.037021909 |
| SRM     | 2.729 | 0.078665699 | CXorf26  | 2.12   | 0.393517901 |
| L1CAM   | 0.359 | 0.048132215 | GNG10    | 0.233  | 0.002025624 |
| ICAM1   | 0.26  | 0.000630761 | INTS1    | 3.712  | 0.065530788 |
| MRC2    | 0.333 | 0.028636182 | STX10    | 3.078  | 0.226708252 |
| CTTN    | 0.492 | 0.173356063 | PHF5A    | 0.305  | 0.046822229 |
| LAMA5   | 0.416 | 0.266353993 | TGFBI    | 4.446  | 0.004014802 |
| JUP     | 0.39  | 0.053833673 | CD46     | 0.381  | 0.172247544 |
| LASP1   | 0.327 | 0.007767802 | DDX31    | 2.031  | 0.382265331 |
| WDHD1   | 0.466 | 0.162234435 | MARCKSL1 | 0.03   | 9.46722E-15 |
| CSDE1   | 2.254 | 0.174137426 | F2       | 17.519 | 3.55821E-10 |

|           |        |             |          |        |             |
|-----------|--------|-------------|----------|--------|-------------|
| BCAM      | 0.248  | 0.001358693 | KIAA1524 | 2.434  | 0.554078839 |
| ACSF2     | 0.392  | 0.066048293 | PEX11B   | 2.516  | 0.153509077 |
| PTK7      | 0.355  | 0.044385961 | CECR5    | 2.756  | 0.111454982 |
| BTF3      | 2.496  | 0.141811133 | LGMN     | 0.468  | 0.288973473 |
| CTSB      | 0.328  | 0.00801505  | CLPTM1   | 2.538  | 0.366891044 |
| BCAP31    | 0.427  | 0.076643407 | LRRC40   | 2.994  | 0.22912266  |
| POLR2A    | 0.494  | 0.410648327 | PKP2     | 25.373 | 1.42296E-12 |
| PEA15     | 2.588  | 0.064212912 | GEMIN4   | 2.409  | 0.27069171  |
| MANF      | 0.365  | 0.020574672 | RAI14    | 0.33   | 0.169897897 |
| MFI2      | 0.331  | 0.018963816 | NDUFS6   | 0.45   | 0.255206945 |
| PXDN      | 0.334  | 0.089237609 | STXBP2   | 2.096  | 0.681994181 |
| WDR12     | 2.528  | 0.145356325 | PTPN2    | 2.046  | 0.438796978 |
| TLL12     | 3.036  | 0.049742784 | FYTTD1   | 0.489  | 0.30240431  |
| YARS2     | 2.428  | 0.284220801 | A2M      | 4.647  | 0.00198062  |
| ACTBL2    | 2.108  | 0.596043593 | SLC16A3  | 0.469  | 0.265679571 |
| SQSTM1    | 5.831  | 0.000164837 | ZNF207   | 0.339  | 0.046822229 |
| KRT14     | 3.735  | 0.00651051  | IGBP1    | 4.481  | 0.026777996 |
| HIST1H2AG | 0.199  | 1.87581E-05 | ATP6AP2  | 3.165  | 0.088000092 |
| HIST1H1B  | 0.396  | 0.043506322 | MRPL9    | 0.309  | 0.143490101 |
| UMPS      | 2.461  | 0.117979399 | CBS      | 2.234  | 0.615942293 |
| EEF1B2    | 2.572  | 0.050587741 | TMEM41B  | 0.043  | 4.65429E-11 |
| TPX2      | 0.404  | 0.096505241 | CLNS1A   | 2.61   | 0.223664785 |
| OAT       | 0.496  | 0.366891044 | XPO7     | 4.189  | 0.01560737  |
| NAP1L4    | 2.075  | 0.355110573 | PCCB     | 0.392  | 0.145370834 |
| CRIP2     | 0.476  | 0.175156132 | COMMD3   | 3.145  | 0.142722001 |
| BAG2      | 2.185  | 0.104137457 | CSRP2    | 0.475  | 0.305955953 |
| HP1BP3    | 0.426  | 0.074556355 | LEO1     | 2.046  | 0.432909458 |
| NPM3      | 2.378  | 0.230876898 | ITIH3    | 2.282  | 0.504015002 |
| CDKN2A    | 3.616  | 0.019029267 | ZCCHC8   | 2.398  | 0.476059708 |
| TBL1XR1   | 0.443  | 0.270603375 | NDUFA8   | 0.476  | 0.416063942 |
| HIST1H1D  | 0.434  | 0.084850264 | SLC1A4   | 2.731  | 0.119391722 |
| TPT1      | 2.738  | 0.016232065 | NUBP1    | 3.961  | 0.059360118 |
| RAB21     | 2.036  | 0.273008364 | KANK2    | 2.052  | 0.659198425 |
| ECI2      | 0.488  | 0.318358542 | TSTA3    | 0.374  | 0.103969402 |
| HIST1H1A  | 0.285  | 0.010325657 | DRG2     | 2.188  | 0.608357213 |
| HIST1H2AB | 0.482  | 0.168029788 | NDUFAB1  | 3.398  | 0.057167135 |
| PSIP1     | 0.316  | 0.009155557 | ITIH2    | 4.467  | 0.003019504 |
| IPO4      | 3.77   | 0.01759168  | MTOR     | 5.02   | 0.034717955 |
| TSR1      | 2.503  | 0.169169542 | VAMP8    | 0.394  | 0.201476308 |
| HBA2      | 16.943 | 2.38294E-15 | PTPMT1   | 2.982  | 0.076889293 |
| KRT19     | 4.403  | 0.000283845 | URB1     | 2.648  | 0.338029555 |
| THBS1     | 8.96   | 9.18289E-07 | INTS7    | 2.17   | 0.54267803  |
| KIFC1     | 0.466  | 0.347704775 | DENR     | 0.41   | 0.363009333 |
| GNAI1     | 0.437  | 0.283114559 | PFDN1    | 2.389  | 0.277910191 |



|          |       |             |          |        |             |
|----------|-------|-------------|----------|--------|-------------|
| HLTF     | 0.271 | 0.018963816 | STX7     | 0.228  | 0.008654768 |
| SOD2     | 0.328 | 0.007862366 | TP53I3   | 3.082  | 0.13853348  |
| HSPBP1   | 2.145 | 0.350857664 | APOA1    | 5.934  | 1.37901E-05 |
| FHL1     | 0.402 | 0.072725985 | ATG9A    | 2.077  | 0.347327827 |
| ABCF2    | 3.093 | 0.04979527  | CRLF3    | 2.299  | 0.594970552 |
| FXR2     | 2.047 | 0.472083894 | TGOLN2   | 0.474  | 0.277910191 |
| RPL26    | 0.108 | 7.85814E-10 | DDTL     | 2.499  | 0.337412032 |
| MAK16    | 2.014 | 0.382265331 | ACYP1    | 0.172  | 0.000124406 |
| QPRT     | 0.389 | 0.120541007 | ICT1     | 0.499  | 0.477738196 |
| MDN1     | 2.401 | 0.080123024 | CKS1B    | 0.428  | 0.168029788 |
| STAG2    | 0.464 | 0.318394554 | TRMT61A  | 2.579  | 0.373487093 |
| SLIRP    | 0.349 | 0.016266846 | RRP7A    | 2.075  | 0.619359793 |
| PDIA5    | 0.482 | 0.152265947 | ELOVL1   | 0.253  | 0.009772286 |
| PRRC2C   | 2.941 | 0.066888685 | MGMT     | 3.151  | 0.049580009 |
| SUN2     | 0.273 | 0.019029267 | NDUFS4   | 0.449  | 0.291186521 |
| SERPINB6 | 0.43  | 0.127818963 | DNAJB12  | 4.898  | 0.002649718 |
| UBXN1    | 2.043 | 0.36788067  | HAGH     | 0.449  | 0.280121509 |
| BRD4     | 0.398 | 0.208771883 | SNX4     | 2.466  | 0.457766822 |
| NTMT1    | 2.73  | 0.094843467 | DR1      | 2.2    | 0.531680544 |
| DDX56    | 2.121 | 0.358512609 | ADRM1    | 0.357  | 0.077064988 |
| CAV1     | 3.449 | 0.003620666 | COX7A2   | 0.431  | 0.286250426 |
| RIC8A    | 2.272 | 0.287945148 | ALG5     | 4.115  | 0.05562428  |
| CYR61    | 2.631 | 0.120541007 | C12orf5  | 3.322  | 0.157341961 |
| SPR      | 2.188 | 0.389076449 | PIP4K2C  | 2.401  | 0.532263813 |
| HADH     | 0.24  | 0.000436456 | CNRIP1   | 2.104  | 0.600683038 |
| GRWD1    | 3.644 | 0.016661319 | GOPC     | 2.207  | 0.54267803  |
| B2M      | 0.108 | 6.18969E-10 | OTUD6B   | 5.437  | 0.005067108 |
| RPLP1    | 3.184 | 0.007011563 | STK3     | 0.483  | 0.304207987 |
| AP3D1    | 2.141 | 0.345873133 | TGFB1I1  | 3.696  | 0.174587085 |
| UQCRH    | 2.037 | 0.273888949 | SULT1A1  | 0.41   | 0.208979483 |
| HN1L     | 0.399 | 0.117307912 | UQCRQ    | 2.753  | 0.127818963 |
| HPCAL1   | 0.394 | 0.168876787 | CCDC90B  | 2.561  | 0.239400867 |
| TRMT112  | 2.499 | 0.143269078 | SLC25A15 | 2.621  | 0.190979545 |
| FAM82B   | 0.487 | 0.405415556 | CPD      | 16.679 | 5.2542E-13  |
| BCAT1    | 2.362 | 0.227580262 | ACAD8    | 2.15   | 0.427184048 |
| ALB      | 4.644 | 8.7433E-05  | CORO1A   | 2.153  | 0.398542775 |
| EIF3G    | 2.003 | 0.302552867 | RPS28    | 0.396  | 0.181142331 |
| PSMB5    | 0.469 | 0.161911786 | HBD      | 6.455  | 7.14796E-07 |
| HSPA14   | 2.66  | 0.186369198 | DCAF7    | 27.511 | 1.48106E-13 |
| TUBG1    | 2.806 | 0.141756552 | LSR      | 0.491  | 0.52011034  |
| BRD3     | 0.367 | 0.102443218 | PNPLA6   | 4.211  | 0.069519135 |
| HK2      | 3.049 | 0.090965267 | TRIM26   | 2.121  | 0.670992196 |
| CDK11B   | 2.072 | 0.339162587 | PAPOLA   | 2.827  | 0.084131043 |
| NOC4L    | 2.166 | 0.315408003 | JAGN1    | 0.05   | 4.81205E-10 |

|           |        |             |          |        |             |
|-----------|--------|-------------|----------|--------|-------------|
| EIF1      | 2.678  | 0.143490101 | ACOT13   | 0.34   | 0.085332205 |
| NLE1      | 3.002  | 0.07434411  | SIRT1    | 5.018  | 0.035897899 |
| CCNB1     | 0.454  | 0.305955953 | MRGBP    | 19.046 | 8.83456E-10 |
| RNF20     | 7.994  | 9.47683E-06 | MRPL17   | 2.686  | 0.439439151 |
| KDM1A     | 0.385  | 0.133551026 | MECP2    | 0.484  | 0.301348862 |
| TOMM22    | 2.481  | 0.133530691 | LTF      | 5.176  | 0.000869373 |
| GFRA1     | 0.491  | 0.382427321 | VAMP7    | 0.411  | 0.133530691 |
| METAP2    | 3.168  | 0.054307886 | AK3      | 0.276  | 0.030100052 |
| SRSF3     | 0.306  | 0.005457971 | CCNH     | 0.355  | 0.255206945 |
| NDUFA7    | 0.259  | 0.017486346 | MPP5     | 2.262  | 0.521085499 |
| FKBP2     | 0.425  | 0.172796936 | FAM129A  | 16.453 | 4.74432E-15 |
| ZNF638    | 12.449 | 2.18748E-08 | SLC35F6  | 0.068  | 2.28187E-10 |
| HMGNI     | 0.189  | 0.000989469 | DCUN1D5  | 2.131  | 0.526655245 |
| EIF4B     | 2.002  | 0.495603729 | DERL2    | 2.028  | 0.429105575 |
| MAVS      | 0.468  | 0.258627425 | SELT     | 3.451  | 0.215786101 |
| IGSF8     | 2.764  | 0.087521805 | SLC12A4  | 2.219  | 0.315246266 |
| GC        | 4.817  | 0.002027371 | PIN4     | 0.256  | 0.018446495 |
| DPYSL3    | 0.463  | 0.269109203 | PPP1R13L | 0.282  | 0.027069726 |
| NUBP2     | 3.808  | 0.028425589 | SNRPGP15 | 0.363  | 0.10339489  |
| VTN       | 4.161  | 0.000388993 | ELOVL5   | 2.394  | 0.226899603 |
| CTR9      | 0.402  | 0.215993263 | CDC42EP1 | 2.078  | 0.609917772 |
| POLR1A    | 2.302  | 0.326545271 | NRM      | 3.484  | 0.028269874 |
| HSP90AA4P | 2.24   | 0.409187249 | ATG4B    | 2.704  | 0.440796879 |
| PRKAR2A   | 2.715  | 0.131356806 | TMEM55B  | 2.202  | 0.609917772 |
| GNG12     | 0.325  | 0.018113953 | TOLLIP   | 4.068  | 0.014101276 |
| GLB1      | 2.591  | 0.153509077 | NKAP     | 2.17   | 0.339763872 |
| ADAM10    | 0.437  | 0.272296037 | CASP3    | 5.35   | 0.00071505  |
| SRP19     | 2.322  | 0.302424916 | PRKRIP1  | 6.288  | 0.000762461 |
| PSMB8     | 0.409  | 0.194570212 | MRPL28   | 3.018  | 0.268584528 |
| BZW1      | 5.441  | 0.000523917 | CD63     | 0.328  | 0.073538376 |
| RBM19     | 2.254  | 0.338029555 | MRPL16   | 2.144  | 0.315408003 |
| JMJD6     | 3.629  | 0.031254368 | APOH     | 3.527  | 0.02253674  |
| PFN2      | 0.465  | 0.196737931 | DIAPH3   | 0.469  | 0.359762252 |
| H1FO      | 0.212  | 4.75597E-05 | PRMT3    | 2.372  | 0.418361852 |
| VPS4A     | 2.01   | 0.480624893 | GSK3A    | 2.751  | 0.422914247 |
| PPP2R5D   | 5.209  | 0.007818504 | SCARB1   | 2.227  | 0.32035195  |
| EMG1      | 2.013  | 0.503007786 | TARSL2   | 0.292  | 0.035897899 |
| SERPINB1  | 0.491  | 0.336240687 | RBMS3    | 0.402  | 0.178257612 |
| CLPTM1L   | 2.534  | 0.175156132 | SAP130   | 0.488  | 0.329998258 |
| TYMS      | 2.708  | 0.310296376 | TSPAN6   | 2.164  | 0.556107783 |
| PAFAH1B2  | 2.149  | 0.410648327 | TOR1A    | 2.131  | 0.652268691 |
| CLPX      | 2.367  | 0.203398072 | CNPY4    | 0.319  | 0.061677322 |
| SARM1     | 2.271  | 0.49221404  | SRP9     | 0.223  | 0.000438986 |
| HBG1      | 53.375 | 1.07563E-16 | HSD17B7  | 0.465  | 0.444761113 |

|          |        |             |          |        |             |
|----------|--------|-------------|----------|--------|-------------|
| B3GAT3   | 2.36   | 0.291659624 | S100A6   | 0.354  | 0.016496156 |
| PURA     | 3.128  | 0.056796409 | BKPyVgp5 | 0.435  | 0.181994008 |
| UBE2D2   | 2.433  | 0.190924786 | APOM     | 6.98   | 4.24533E-05 |
| MRPS36   | 0.164  | 0.000320764 | MED6     | 2.522  | 0.52426326  |
| HMG2     | 0.033  | 1.07563E-16 | CHCHD1   | 0.483  | 0.352436638 |
| C12orf23 | 0.447  | 0.17554466  | MRPL10   | 4.294  | 0.112120833 |
| CAT      | 0.476  | 0.375037077 | MRPL35   | 14.426 | 5.64647E-08 |
| FADD     | 3.575  | 0.103969402 | DIRAS2   | 15.855 | 1.41688E-14 |
| POLR1E   | 2.209  | 0.394115397 | HTRA1    | 0.338  | 0.185267174 |
| F5       | 4.68   | 6.48222E-05 | LXN      | 0.358  | 0.111223352 |
| PTMA     | 0.349  | 0.024625365 | RPIA     | 2.157  | 0.639653045 |
| STK39    | 3.322  | 0.169897897 | GMNN     | 2.496  | 0.408949484 |
| EMC8     | 2.329  | 0.300941865 | HERC4    | 2.14   | 0.463618358 |
| HMMR     | 70.028 | 1.07563E-16 | RAI1     | 2.455  | 0.410501186 |
| SLC44A1  | 0.454  | 0.319413097 | C4BPA    | 2.331  | 0.304233349 |
| SLC30A1  | 4.081  | 0.016565483 | RBX1     | 0.407  | 0.157341961 |
| CDK6     | 3.011  | 0.212044223 | CEP290   | 3.891  | 0.008500444 |
| S100A13  | 0.445  | 0.120188055 | RNGTT    | 2.699  | 0.127154153 |
| UCHL3    | 2.105  | 0.382265331 | HMCN1    | 0.417  | 0.27069171  |
| UBE2S    | 3.059  | 0.060574845 | SLC44A2  | 0.254  | 0.017823956 |
| CHCHD2P9 | 0.188  | 0.001081533 | MAN1B1   | 0.477  | 0.49221404  |
| ATP6AP1  | 2.348  | 0.304135114 | CD9      | 0.496  | 0.180605638 |
| RBM42    | 2.185  | 0.400440429 |          |        |             |
